# Supplementary material for: Improvement of the immune efficacy of carbohydrate vaccines by chemical modification on the GM3 antigen
Source: Royal Society of Chemistry journal article supplement (doi:10.1039/c5ob00405e), 2015-01-01
Supplement: c5ob00405e1.pdf [file c5ob00405e1.pdf]

## Electronic Supplementary Information

### Improvement of the Immune Efficacy of Carbohydrate Vaccines by Chemical Modification on GM3 Antigen

Xiu-Jing Zheng, Fan Yang, Mingwei Zheng, Chang-Xin Huo, Ye Zhang, and Xin-Shan Ye\*

State Key Laboratory of Natural and Biomimetic Drugs, School of Pharmaceutical Sciences, Peking  
University, Xue Yuan Rd #38, Beijing 100191, China

E-mail: xinshan@bjmu.edu.cn

#### Table of Contents

|                                                                              |    |
|------------------------------------------------------------------------------|----|
| 1. Supplementary Methods and Results on Chemical Synthesis.....              | 1  |
| 1.1. General information .....                                               | 1  |
| 1.2. Compound characterization.....                                          | 1  |
| 2. Supplementary methods and results on biological assay.....                | 10 |
| 2.1. Procedure for coupling carbohydrates with protein.....                  | 10 |
| 2.2. Analysis of the carbohydrate loading levels of the glycoconjugates..... | 10 |
| 2.3. Immunization of mice and serologic assays .....                         | 11 |
| 3. References .....                                                          | 21 |
| 4. NMR spectra of compounds.....                                             | 22 |

## 1. Supplementary Methods and Results on Chemical Synthesis

### 1.1. General information

Unless otherwise noted, all reactions were carried out in oven-dried glassware under an atmosphere of argon or nitrogen. Acetonitrile and dichloromethane were distilled from calcium hydride. Methanol was dried by refluxing with magnesium and then distilled. *N,N*-Dimethylformamide was dried over P<sub>2</sub>O<sub>5</sub> and distilled under vacuum. Reactions were monitored by analytical thin-layer chromatography (TLC) on Merck silica gel 60F<sub>254</sub> plates (0.25 mm), visualized by ultraviolet light and/ or by staining with ceric ammonium molybdate or ninhydrin. <sup>1</sup>H NMR spectra were obtained on Varian INOVA-500 or JEOL JNM-AL300 spectrometer at ambient temperature. Data were reported as follows: chemical shift on the  $\delta$  scale (using either TMS or residual proton solvent as internal standard), multiplicity (br = broad, s = singlet, d = doublet, t = triplet, q = quartet, m = multiplet), integration, and coupling constant(s) in hertz. <sup>13</sup>C NMR spectra were obtained with proton decoupling on a Varian INOVA-500 (125 MHz) and JEOL JNM-AL-300 (75 MHz) spectrometer and were reported in ppm with residual solvent for internal standard (77.0 for CDCl<sub>3</sub>). High resolution spectra were obtained on a PE SCLEX QSTAR spectrometer.

### 1.2. Compound characterization

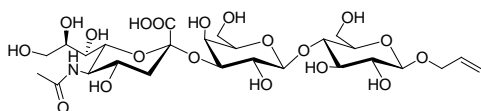

Compound **2**<sup>[1]</sup>

To a stirred solution of **22** (178.0 mg, 0.167 mmol) in methanol (10 mL) was added a sodium methoxide solution in methanol (30%, 0.02 g, 0.11 mmol). The mixture was stirred at r.t. for 4 h. The solvent was concentrated in vacuum, and then an aqueous NaOH solution (1 N, 3 mL) was added. After the reaction finished within 12-24 h, as indicated by TLC, the mixture was neutralized with 1N HCl in methanol to PH = 6-8. The reaction mixture was concentrated in vacuum, and then purified on a Biogel P-2 column with H<sub>2</sub>O as the eluent to afford **2** (105.0 mg, yield = 93%). [ $\alpha$ ]<sub>D</sub> = -7.97 (*c* = 1.1, MeOH); <sup>1</sup>H-NMR (500 MHz, D<sub>2</sub>O)  $\delta$  6.03-5.93 (m, 1H), 5.38 (dq, 1H, *J* = 1.5 Hz, 17.5 Hz), 5.28 (dd, 1H, *J*<sub>1</sub> = 1.0 Hz, *J*<sub>2</sub> = 10.5 Hz), 4.52 (d, 1H, *J* = 8.5 Hz, anomeric H), 4.51 (d, 1H *J* = 7.0 Hz, anomeric H), 4.39 (ddt, 1H, *J*<sub>1</sub> = *J*<sub>2</sub> = 1.0 Hz, *J*<sub>3</sub> = 5.5 Hz, *J*<sub>4</sub> = 13.0 Hz), 4.22 (ddt, 1H, *J*<sub>1</sub> = *J*<sub>2</sub> = 1.5 Hz, *J*<sub>3</sub> = 6.5

Hz,  $J_4 = 13.0$  Hz), 4.11 (dd, 1H,  $J_1 = 5.0$  Hz,  $J_2 = 3.5$  Hz), 3.97 (m, 2H), 3.92-3.54 (m, 15H), 3.33 (dd, 1H,  $J_1 = 8.0$  Hz,  $J_2 = 9.0$  Hz), 2.75 (dd, 1H,  $J_1 = 4.5$  Hz,  $J_2 = 12.5$  Hz, sialH-3eq), 2.02 (s, 3H), 1.80 (t, 1H,  $J_1 = J_2 = 12.0$  Hz, sialH-3ax);  $^{13}\text{C}$ -NMR (125 MHz,  $\text{D}_2\text{O}$ )  $\delta$  177.64, 176.53, 135.90, 121.42, 105.27, 103.67, 102.43, 80.85, 78.11, 77.79, 77.40, 77.03, 75.50, 75.44, 74.41, 73.30, 72.00, 70.99, 70.72, 70.10, 65.20, 63.66, 62.69, 54.30, 42.26, 24.68; HRMS ( $m/z$ ):  $[\text{M}+\text{H}]^+$  calcd. for  $[\text{C}_{26}\text{H}_{44}\text{NO}_{19}]^+$ , 674.2502; found, 674.2505.

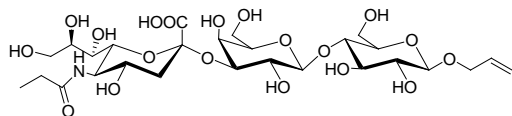

Compound 3

Yield = 90%;  $[\alpha]_{\text{D}} = -8.04$  ( $c = 0.9$ , MeOH);  $^1\text{H}$ -NMR (500 MHz,  $\text{D}_2\text{O}$ )  $\delta$  6.02-5.93 (m, 1H), 5.38 (m, 1H), 5.28 (m, 1H), 4.52 (d, 1H,  $J = 8.0$  Hz, anomeric H), 4.51 (d, 1H,  $J = 8.0$  Hz, anomeric H), 4.39 (m, 1H), 4.22 (dd, 1H,  $J_1 = 6.5$  Hz,  $J_2 = 12.5$  Hz), 4.11 (dd, 1H,  $J_1 = 11.0$  Hz,  $J_2 = 2.0$  Hz), 3.98 (dd, 1H,  $J_1 = 12.0$  Hz,  $J_2 = 2.0$  Hz), 3.95 (d, 1H,  $J = 3.5$  Hz), 3.89-3.54 (m, 15H), 3.32 (t, 1H,  $J_1 = J_2 = 9.0$  Hz), 2.75 (dd, 1H,  $J_1 = 4.5$  Hz,  $J_2 = 12.5$  Hz, sialH-3eq), 2.29 (q, 2H,  $J = 7.5$  Hz), 1.85 (t, 1H,  $J_1 = J_2 = 12.5$  Hz, sialH-3ax), 1.11 (t, 3H,  $J = 7.5$  Hz);  $^{13}\text{C}$ -NMR (125 MHz,  $\text{D}_2\text{O}$ )  $\delta$  179.73, 173.52, 134.01, 119.50, 103.53, 101.79, 99.96, 78.99, 76.20, 75.81, 75.49, 75.14, 73.78, 73.55, 72.10, 71.40, 70.10, 68.91, 68.56, 68.30, 63.49, 61.68, 60.80, 52.26, 40.07, 29.98, 10.22; HRMS ( $m/z$ ):  $[\text{M}+\text{NH}_4]^+$  calcd. for  $[\text{C}_{27}\text{H}_{49}\text{N}_2\text{O}_{19}]^+$ , 705.2924; found, 705.2935.

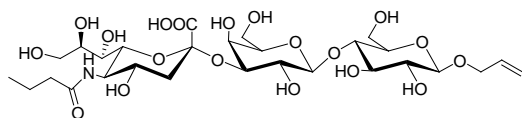

Compound 4

Yield = 84%;  $[\alpha]_{\text{D}} = -6.26$  ( $c = 0.8$ , MeOH);  $^1\text{H}$ -NMR (500 MHz,  $\text{D}_2\text{O}$ )  $\delta$  6.02-5.93 (m, 1H), 5.38 (dq, 1H,  $J = 1.5$  Hz, 17.5 Hz), 5.28 (m, 1H), 4.52 (d, 1H,  $J = 7.5$  Hz, anomeric H), 4.51 (d, 1H,  $J = 7.5$  Hz, anomeric H), 4.39 (ddt, 1H,  $J_1 = J_2 = 1.5$  Hz,  $J_3 = 5.5$  Hz,  $J_4 = J_3 = 12.5$  Hz), 4.22 (ddt, 1H,  $J_1 = J_2 = 1.0$  Hz,  $J_3 = 7.5$  Hz,  $J_4 = 12.5$  Hz), 4.11 (dd, 1H,  $J_1 = 10.0$  Hz,  $J_2 = 3.0$  Hz), 3.98 (dd, 1H,  $J_1 = 12.0$  Hz,  $J_2 = 2.0$  Hz), 3.95 (d, 1H,  $J = 3.0$  Hz), 3.92-3.78 (m, 4H), 3.78-3.54 (m, 11H), 3.32 (dd, 1H,  $J_1 = 8.0$  Hz,  $J_2 = 9.0$  Hz), 2.75 (dd, 1H,  $J_1 = 4.0$  Hz,  $J_2 = 12.0$  Hz, sialH-3eq), 2.26 (t, 2H,  $J_1 = J_2 = 7.5$  Hz),

1.80 (t, 1H,  $J_1 = J_2 = 12.0$  Hz, sialH-3ax), 1.60 (hexad, 2H,  $J = 7.5$  Hz), 0.90 (t, 3H,  $J_1 = J_2 = 7.5$  Hz);  $^{13}\text{C-NMR}$  (125 MHz,  $\text{D}_2\text{O}$ )  $\delta$  178.88, 174.6, 134.02, 119.49, 103.38, 101.79, 100.53, 78.99, 76.22, 75.91, 75.50, 75.14, 73.65, 73.55, 72.50, 71.40, 70.11, 68.96, 68.93, 68.19, 63.39, 61.76, 60.81, 52.33, 40.53, 38.549, 19.74, 13.56; HRMS ( $m/z$ ):  $[\text{M}+\text{Na}]^+$  calcd. for  $[\text{C}_{28}\text{H}_{47}\text{NNaO}_{19}]^+$ , 724.2634; found, 724.2637.

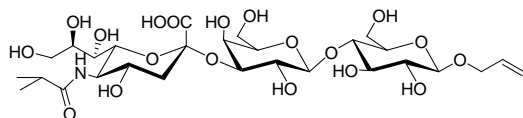

Compound 5

Yield = 90%;  $[\alpha]_{\text{D}} = -8.11$  ( $c = 1.0$ , MeOH);  $^1\text{H-NMR}$  (500 MHz,  $\text{D}_2\text{O}$ )  $\delta$  6.02-5.93 (m, 1H), 5.38 (dd, 1H,  $J_1 = 1.5$  Hz,  $J_2 = 17.5$  Hz), 5.28 (dd, 1H,  $J_1 = 1.0$  Hz,  $J_2 = 10.5$  Hz), 4.53 (d, 1H,  $J = 8.0$  Hz, anomeric H), 4.52 (d, 1H,  $J = 8.0$  Hz, anomeric H), 4.39 (dd, 1H,  $J_1 = 5.5$  Hz,  $J_2 = 12.5$  Hz), 4.22 (dd, 1H,  $J_1 = 6$  Hz,  $J_2 = 12.5$  Hz), 4.11 (dd, 1H,  $J_1 = 10.0$  Hz,  $J_2 = 3.0$  Hz), 3.98 (dd, 1H,  $J_1 = 12.5$  Hz,  $J_2 = 2.0$  Hz), 3.95 (d, 1H,  $J = 3.5$  Hz), 3.94-3.50 (m, 15H), 3.32 (t, 1H,  $J_1 = J_2 = 9.0$  Hz), 2.75 (t, 1H,  $J_1 = 5.0$  Hz,  $J_2 = 12.0$  Hz, sialH-3eq), 2.54 (heptad, 1H,  $J = 7.0$  Hz), 1.80 (t, 1H,  $J_1 = J_2 = 12.0$  Hz, sialH-3ax), 1.12 (d, 3H,  $J = 7.0$  Hz), 1.10 (d, 3H,  $J = 7.5$  Hz);  $^{13}\text{C-NMR}$  (125 MHz,  $\text{D}_2\text{O}$ )  $\delta$  182.92, 174.64, 134.01, 119.50, 103.39, 101.79, 100.52, 78.99, 76.22, 75.91, 75.50, 75.14, 73.66, 73.54, 72.50, 71.40, 70.10, 68.95, 68.81, 68.19, 63.26, 61.76, 60.80, 52.19, 40.55, 35.95, 19.69, 19.16; HRMS ( $m/z$ ):  $[\text{M}+\text{K}]^+$  calcd. for  $[\text{C}_{28}\text{H}_{47}\text{NKO}_{19}]^+$ , 740.2374; found, 740.2340.

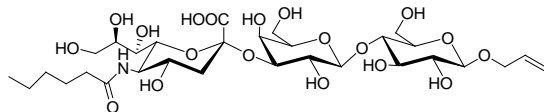

Compound 6

Yield = 86%;  $[\alpha]_{\text{D}} = -7.91$  ( $c = 1.0$ , MeOH);  $^1\text{H-NMR}$  (500 MHz,  $\text{D}_2\text{O}$ )  $\delta$  6.02-5.93 (m, 1H), 5.38 (dd, 1H,  $J_1 = 1.5$  Hz,  $J_2 = 17.0$  Hz), 5.28 (d, 1H,  $J = 10.5$  Hz), 4.53 (d, 1H,  $J = 8.0$  Hz, anomeric H), 4.53 (d, 1H,  $J = 8.0$  Hz, anomeric H), 4.86 (dd, 1H,  $J_1 = 6.0$  Hz,  $J_2 = 13.0$  Hz), 4.22 (dd, 1H,  $J_1 = 6.5$  Hz,  $J_2 = 13.0$  Hz), 4.11 (dd, 1H,  $J_1 = 3.5$  Hz,  $J_2 = 10.0$  Hz), 3.98 (d, 1H,  $J = 10.0$  Hz), 3.95 (d, 1H,  $J = 3.5$  Hz), 3.90-3.55 (m, 15H), 3.33 (dd, 1H,  $J_1 = 8.0$  Hz,  $J_2 = 9.0$  Hz), 2.76 (dd, 1H,  $J_1 = 4.5$  Hz,  $J_2 = 12.5$  Hz).

Hz, sialH-3eq), 2.27 (t, 2H,  $J_1 = J_2 = 7.0$  Hz), 1.81 (t, 1H,  $J_1 = J_2 = 12.0$  Hz, sialH-3ax), 1.59 (pentad, 2H,  $J = 7.0$  Hz), 1.32-1.23 (m, 4H), 0.86 (t, 3H,  $J_1 = J_2 = 7.0$  Hz);  $^{13}\text{C-NMR}$  (125 MHz,  $\text{D}_2\text{O}$ )  $\delta$  178.96, 174.32, 133.81, 119.34, 103.20, 101.60, 100.27, 78.77, 76.04, 75.72, 75.33, 74.96, 73.51, 73.36, 72.30, 71.24, 69.94, 68.83, 68.68, 68.02, 63.18, 61.59, 60.61, 52.13, 40.32, 36.46, 31.08, 25.65, 22.23, 13.77; HRMS ( $m/z$ ):  $[\text{M}+\text{Na}]^+$  calcd. for  $[\text{C}_{30}\text{H}_{51}\text{NNaO}_{19}]^+$ , 752.2947; found, 752.2940.

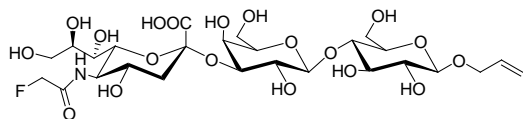

Compound 7

Yield = 75%;  $[\alpha]_{\text{D}} = -8.64$  ( $c = 0.9$ , MeOH);  $^1\text{H-NMR}$  (500 MHz,  $\text{D}_2\text{O}$ )  $\delta$  5.89-5.82 (m, 1H), 5.26 (d, 1H,  $J = 17.5$  Hz), 5.18 (d, 1H,  $J = 10.5$  Hz), 4.80 (d, 2H,  $J_{\text{F-H}} = 46.0$  Hz), 4.42 (d, 2H,  $J = 8.0$  Hz, overlapped anomeric H), 4.28 (dd, 1H,  $J_1 = 5.5$  Hz,  $J_2 = 12.5$  Hz), 4.11 (dd, 1H,  $J_1 = 6.5$  Hz,  $J_2 = 12.5$  Hz), 4.01 (dd, 1H,  $J_1 = 10.0$  Hz,  $J_2 = 3.0$  Hz), 3.90-3.40 (m, 17H), 3.21 (t, 1H,  $J_1 = J_2 = 8.5$  Hz), 2.66 (dd, 1H,  $J_1 = 5.0$  Hz,  $J_2 = 12.5$  Hz, sialH-3eq), 1.71 (dd, 1H,  $J_1 = J_2 = 12.0$  Hz, sialH-3ax);  $^{13}\text{C-NMR}$  (125 MHz,  $\text{D}_2\text{O}$ )  $\delta$  174.47, 171.40 (d, 1C,  $J_{\text{F-C}} = 18.5$  Hz), 133.33, 118.77, 109.68, 102.68, 101.09, 99.86, 80.0 (d, 1C,  $J_{\text{F-C}} = 180.6$  Hz), 78.32, 75.52, 75.19, 74.79, 74.43, 72.84, 72.50, 71.89, 70.69, 69.39, 68.20, 68.04, 67.48, 62.61, 61.04, 60.12, 51.33, 39.70; HRMS ( $m/z$ ):  $[\text{M}+\text{Na}]^+$  calcd. for  $[\text{C}_{26}\text{H}_{42}\text{FNNaO}_{19}]^+$ , 714.2227; found, 714.2251.

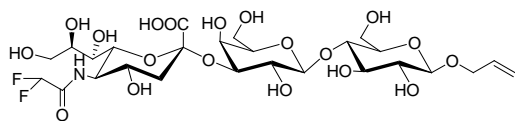

Compound 8

Yield = 86%;  $[\alpha]_{\text{D}} = -8.85$  ( $c = 1.2$ , MeOH);  $^1\text{H-NMR}$  (500 MHz,  $\text{D}_2\text{O}$ )  $\delta$  6.16 (t, 1H,  $J_{\text{F-H}} = 54.0$  Hz), 6.01-5.93 (m, 1H), 5.38 (dt, 1H,  $J = 1.5$  Hz, 17.5 Hz), 5.28 (dq, 1H,  $J = 1.0$  Hz, 10.5 Hz), 4.52 (d, 1H,  $J = 8.5$  Hz, anomeric H), 4.51 (d, 1H,  $J = 7.0$  Hz, anomeric H), 4.39 (ddt, 1H,  $J_1 = J_2 = 1.0$  Hz,  $J_3 = 5.5$  Hz,  $J_4 = 13.0$  Hz), 4.22 (ddt, 1H,  $J_1 = J_2 = 1.5$  Hz,  $J_3 = 6.5$  Hz,  $J_4 = 13.0$  Hz), 4.11 (dd, 1H,  $J_1 = 10.0$  Hz,  $J_2 = 3.0$  Hz), 4.02-3.94 (m, 3H), 3.92-3.54 (m, 14H), 3.32 (dd, 1H,  $J_1 = 8.0$  Hz,  $J_2 = 9.0$  Hz), 2.77 (dd, 1H,  $J_1 = 4.0$  Hz,  $J_2 = 12.0$  Hz, sialH-3eq), 1.83 (t, 1H,  $J_1 = J_2 = 12.0$  Hz, sialH-3ax);

$^{13}\text{C}$ -NMR (125 MHz,  $\text{D}_2\text{O}$ )  $\delta$  174.38, 166.28 (t, 1C,  $J_{F-C} = 25.75$  Hz), 134.03, 119.50, 109.01 (t, 1C,  $J_{F-C} = 247$  Hz), 103.38, 101.80, 100.48, 79.01, 76.23, 75.88, 75.50, 75.14, 73.55, 73.02, 72.56, 71.40, 70.11, 68.80, 68.72, 68.18, 63.31, 61.75, 60.82, 52.46, 40.33; HRMS ( $m/z$ ):  $[\text{M}+\text{Na}]^+$  calcd. for  $[\text{C}_{26}\text{H}_{41}\text{F}_2\text{NNaO}_{19}]^+$ , 732.2133; found, 732.2147.

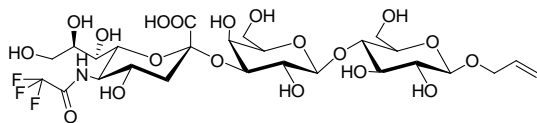

**Compound 9**

Yield = 70%;  $[\alpha]_{\text{D}} = -8.61$  ( $c = 1.1$ , MeOH);  $^1\text{H}$ -NMR (500 MHz,  $\text{D}_2\text{O}$ )  $\delta$  6.02-5.93 (m, 1H), 5.38 (dd, 1H,  $J_1 = 3.0$  Hz,  $J_2 = 17.5$  Hz), 5.28 (d, 1H,  $J = 10.5$  Hz), 4.53 (d, 2H,  $J = 8.5$  Hz, overlapped anomeric H), 4.39 (dd, 1H,  $J_1 = 5.5$  Hz,  $J_2 = 12.5$  Hz), 4.22 (dd, 1H,  $J_1 = 6.5$  Hz,  $J_2 = 12.5$  Hz), 4.12 (dd, 1H,  $J_1 = 10.0$  Hz,  $J_2 = 3.0$  Hz), 4.03-3.96 (m, 3H), 3.92-3.56 (m, 14H), 3.33 (t, 1H,  $J_1 = J_2 = 8.5$  Hz), 2.78 (dd, 1H,  $J_1 = 5.0$  Hz,  $J_2 = 12.5$  Hz, sialH-3eq), 1.83 (t, 1H,  $J_1 = J_2 = 12.0$  Hz, sialH-3eq);  $^{13}\text{C}$ -NMR (125 MHz,  $\text{D}_2\text{O}$ )  $\delta$  174.51, 160.13 (q, 1C,  $J_{F-C} = 38.0$  Hz), 134.02, 119.50, 116.51 (q, 1C,  $J_{F-C} = 285.0$  Hz), 103.38, 101.80, 100.58, 79.02, 76.24, 75.90, 75.50, 75.15, 73.55, 72.81, 72.66, 71.41, 70.11, 68.78, 68.15, 63.26, 61.76, 60.82, 52.98, 40.42; HRMS ( $m/z$ ):  $[\text{M}+\text{Na}]^+$  calcd. for  $[\text{C}_{26}\text{H}_{40}\text{F}_3\text{NNaO}_{19}]^+$ , 750.2039; found, 750.2039.

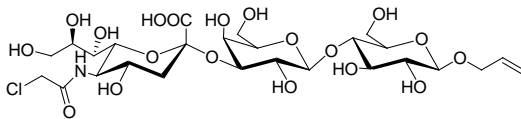

**Compound 10**

Yield = 71%;  $[\alpha]_{\text{D}} = -10.64$  ( $c = 0.9$ , MeOH);  $^1\text{H}$ -NMR (500 MHz,  $\text{D}_2\text{O}$ )  $\delta$  6.03-5.93 (m, 1H), 5.38 (dq, 1H,  $J = 1.5$  Hz, 17.5 Hz), 5.28 (dq, 1H,  $J = 1.5$  Hz, 10.5 Hz), 4.52 (d, 1H,  $J = 8.0$  Hz, anomeric H), 4.51 (d, 1H,  $J = 8.0$  Hz, anomeric H), 4.39 (ddt, 1H,  $J_1 = J_2 = 1.5$  Hz,  $J_3 = 5.5$  Hz,  $J_4 = 12.5$  Hz), 4.22 (ddt, 1H,  $J_1 = J_2 = 1.5$  Hz,  $J_3 = 5.5$  Hz,  $J_4 = 12.5$  Hz), 4.16 (d, 2H,  $J = 14.0$  Hz,  $-\text{COCH}_2\text{Cl}$ ), 4.11 (dd, 1H,  $J_1 = 10$  Hz,  $J_2 = 3.5$  Hz), 3.98 (dd, 1H,  $J_1 = 12.5$  Hz,  $J_2 = 2.5$  Hz), 3.95 (d, 1H,  $J = 3.5$  Hz), 3.95-3.55 (m, 15H), 3.33 (dd, 1H,  $J_1 = 8.0$  Hz,  $J_2 = 9.0$  Hz), 2.75 (dd, 1H,  $J_1 = 4.5$  Hz,  $J_2 = 12.0$  Hz, sialH-3eq), 1.80 (dd, 1H,  $J_1 = J_2 = 12.0$  Hz, sialH-3ax);  $^{13}\text{C}$ -NMR (125 MHz,  $\text{D}_2\text{O}$ )  $\delta$  174.61, 171.18,

134.02, 119.50, 103.38, 101.79, 100.55, 79.00, 76.23, 75.90, 75.50, 75.14, 73.54, 73.27, 72.59, 71.40, 70.11, 68.91, 68.80, 68.18, 63.30, 61.76, 60.81, 52.84, 43.04, 40.42; HRMS ( $m/z$ ):  $[M+Na]^+$  calcd. for  $[C_{26}H_{42}ClNNaO_{19}]^+$ , 730.1932; found, 730.1906.

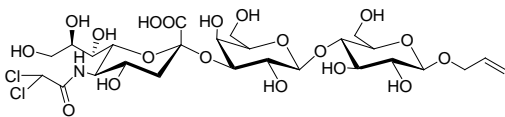

Compound **11**

Yield = 89%;  $[\alpha]_D = -11.64$  ( $c = 1.2$ , MeOH);  $^1H$ -NMR (500 MHz,  $D_2O$ )  $\delta$  6.30 (s, 1H), 5.96 (dq, 1H,  $J = 1.5$  Hz, 17.5 Hz), 5.37 (dd, 1H,  $J_1 = 1.5$  Hz,  $J_2 = 10.5$  Hz), 4.52 (d, 1H,  $J = 8.0$  Hz, anomeric H), 4.51 (d, 1H,  $J = 8.0$  Hz, anomeric H), 4.38 (dd, 1H,  $J_1 = 5.5$  Hz,  $J_2 = 12.5$  Hz), 4.38 (dd, 1H,  $J_1 = 6.5$  Hz,  $J_2 = 13.0$  Hz), 4.14 (dd, 1H,  $J_1 = 3.0$  Hz,  $J_2 = 10.0$  Hz), 4.00-3.55 (m, 18H), 3.32 (t, 1H,  $J = 8.5$  Hz), 2.75 (dd, 1H,  $J_1 = 5.0$  Hz,  $J_2 = 13.0$  Hz, sialH-3eq), 1.88 (t, 1H,  $J_1 = J_2 = 12.0$  Hz, sialH-3ax);  $^{13}C$ -NMR (75MHz,  $D_2O$ )  $\delta$  172.80, 168.02, 133.75, 119.32, 103.10, 101.56, 99.48, 78.70, 75.96, 75.56, 75.28, 74.92, 73.33, 73.14, 71.82, 71.21, 69.90, 68.75, 67.99, 66.71, 63.32, 61.45, 60.57, 52.89, 39.78; HRMS ( $m/z$ ):  $[M+Na]^+$  calcd. for  $[C_{26}H_{41}Cl_2NNaO_{19}]^+$ , 764.1542; found, 764.1550.

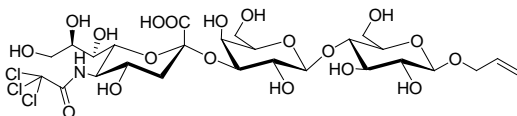

Compound **12**

Yield = 81%;  $[\alpha]_D = -14.20$  ( $c = 1.3$ , MeOH);  $^1H$ -NMR (500 MHz,  $D_2O$ )  $\delta$  6.03-5.93 (m, 1H), 5.35 (dd, 1H,  $J_1 = 1.5$  Hz,  $J_2 = 17.5$  Hz), 5.28 (dd, 1H,  $J_1 = 1.0$  Hz,  $J_2 = 10.5$  Hz), 4.53 (d, 2H,  $J = 8.0$  Hz, overlapped anomeric H), 4.39 (dd, 1H,  $J_1 = 5.5$  Hz,  $J_2 = 12.5$  Hz), 4.22 (dd, 1H,  $J_1 = 6.5$  Hz,  $J_2 = 12.5$  Hz), 4.13 (dd, 1H,  $J_1 = 10.0$  Hz,  $J_2 = 3.0$  Hz), 4.03-3.46 (m, 17H), 3.36-3.31 (m, 1H), 2.80 (dd, 1H,  $J_1 = 5.0$  Hz,  $J_2 = 12.5$  Hz, sialH-3eq), 1.83 (t, 1H,  $J_1 = J_2 = 12.0$  Hz, sialH-3ax);  $^{13}C$ -NMR (125 MHz,  $D_2O$ )  $\delta$  174.58, 165.50, 134.01, 119.50, 103.38, 101.79, 100.55, 79.00, 76.21, 75.89, 75.49, 75.13, 73.54, 72.91, 72.75, 71.40, 70.10, 69.04, 68.55, 68.13, 63.26, 61.75, 60.82, 54.44, 40.74; HRMS ( $m/z$ ):  $[M+Na]^+$  calcd. for  $[C_{26}H_{40}Cl_3NNaO_{19}]^+$ , 798.1152; found, 798.1161.

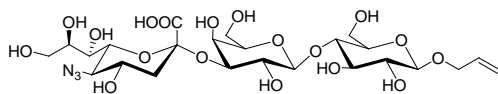

Compound **13**

A suspension of sodium azide (44.0 mg, 0.67 mmol) in 8 mL of pyridine<sup>[2]</sup> was cooled in ice bath. Then triflic anhydride (150.0 mg, 0.56 mmol) was added to the mixture by a syringe in about 5 minutes while stirring. The reaction was maintained for 2 h in ice bath to give a TfN<sub>3</sub>-containing solution (~0.07 mmol TfN<sub>3</sub>, based on 100% conversion of triflic anhydride), 1 mL (~0.07 mmol) of which was then added directly to the solution of **14** (20.0 mg, 0.032 mmol) in 2 mL MeOH, and CuSO<sub>4</sub> (0.5 mg, 0.003 mmol) was added. The diazotransfer reaction was finished in 1 h, as indicated by TLC. The mixture was condensed under reduced pressure. The residue was purified by C-18 reversed-phase column eluted by H<sub>2</sub>O, then H<sub>2</sub>O/MeOH, and then with Biogel P-2 column with H<sub>2</sub>O as the eluent, to afford **13** (13.0 mg, yield = 62%); [ $\alpha$ ]<sub>D</sub> = -18.70 (*c* = 1.0, MeOH); <sup>1</sup>H-NMR (500 MHz, D<sub>2</sub>O)  $\delta$  6.03-5.93 (m, 1H), 5.35 (dq, 1H, *J* = 1.5 Hz, 17.5 Hz), 5.31-5.27 (m, 1H), 4.53 (d, 1H, *J* = 8.0 Hz, anomeric H), 4.52 (d, 1H, *J* = 8.0 Hz, anomeric H), 4.39 (dd, 1H, *J*<sub>1</sub> = 5.5 Hz, *J*<sub>2</sub> = 12.5 Hz), 4.22 (dd, 1H, *J*<sub>1</sub> = 6.5 Hz, *J*<sub>2</sub> = 12.5 Hz), 4.10 (dd, 1H, *J*<sub>1</sub> = 10.0 Hz, *J*<sub>2</sub> = 3.0 Hz), 4.03-3.46 (m, 17H), 3.33 (t, 1H, *J*<sub>1</sub> = *J*<sub>2</sub> = 8.5 Hz), 2.74 (dd, 1H, *J*<sub>1</sub> = 5.0 Hz, *J*<sub>2</sub> = 12.5 Hz, sialH-3eq), 1.80 (t, 1H, *J*<sub>1</sub> = *J*<sub>2</sub> = 12.0 Hz, sialH-3ax); <sup>13</sup>C-NMR (125 MHz, D<sub>2</sub>O)  $\delta$  174.47, 134.02, 119.50, 103.38, 101.80, 100.54, 79.01, 76.20, 75.88, 75.50, 75.14, 73.58, 73.55, 72.68, 71.40, 70.23, 70.08, 69.13, 68.10, 63.33, 63.28, 61.75, 60.82, 40.23; HRMS (*m/z*): [M+Na]<sup>+</sup> calcd. for [C<sub>24</sub>H<sub>39</sub>N<sub>3</sub>O<sub>18</sub>Na]<sup>+</sup>, 680.2121; found, 680.2133.

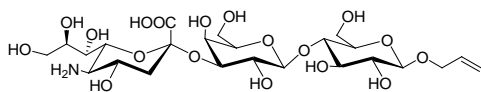

Compound **14**

A stirred solution of **2** (165.0 mg, 0.245 mmol) in aqueous NaOH solution (2 N, 5 mL) was heated at 90 °C for 4-6 h, until the conversion was completed (detected by TLC). The mixture was neutralized with 1N HCl in methanol to PH = 6-8. The reaction mixture was concentrated in vacuo, extracted by MeOH. The organic layer was concentrated in vacuum to give a residue, which was employed for the next reactions. The crude product (10%) was purified by Biogel P-2 column with H<sub>2</sub>O as the eluent, and then by C-18 reversed-phase column with H<sub>2</sub>O as the eluent, to afford **14** (15.0 mg, 0.0233 mmol,



yield = 95%).  $[\alpha]_D = -18.80$  ( $c = 1.0$ , MeOH);  $^1\text{H-NMR}$  (400 MHz,  $\text{D}_2\text{O}$ )  $\delta$  5.97-5.86 (m, 1H), 5.33 (d, 1H,  $J = 17.2$  Hz, allyl H), 5.22 (d, 1H,  $J = 10.4$  Hz, allyl H), 4.47 (d, 1H,  $J = 8.0$  Hz, anomeric H), 4.45 (d, 1H,  $J = 8.0$  Hz, anomeric H), 4.32 (dd, 1H,  $J_1 = 5.6$  Hz,  $J_2 = 12.8$  Hz, allyl H), 4.22 (dd, 1H,  $J_1 = 6.2$  Hz,  $J_2 = 12.4$  Hz, allyl H), 4.03 (dd, 1H,  $J_1 = 10.0$  Hz,  $J_2 = 3.2$  Hz), 3.94-3.46 (m, 16H), 3.26 (m, 1H), 3.19 (t, 1H,  $J_1 = J_2 = 10.0$  Hz), 2.74 (dd, 1H,  $J_1 = 4.8$  Hz,  $J_2 = 12.4$  Hz, sialH-3eq), 1.80 (t, 1H,  $J_1 = J_2 = 12.4$  Hz, sialH-3ax);  $^{13}\text{C-NMR}$  (125 MHz,  $\text{D}_2\text{O}$ )  $\delta$  133.33, 118.77, 102.66, 101.10, 99.76, 72.83, 71.54, 71.46, 70.69, 69.36, 67.81, 67.24, 66.74, 62.23, 61.01, 60.16, 52.19, 39.89; HRMS ( $m/z$ ):  $[\text{M}+\text{H}]^+$  calcd. for  $[\text{C}_{24}\text{H}_{42}\text{NO}_{18}]^+$ , 632.2396; found, 632.2396.

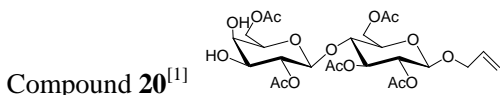

Compound **21** (100.0 mg, 0.237 mmol) was dissolved in pyridine (2 mL) and acetic anhydride (1.8 mL), DMAP (15 mg) was added. The mixture was stirred overnight. The reaction mixture was concentrated on reduced pressure. The residue was dissolved in 90% TFA aqueous solution (5 mL) at  $-20$  °C. The mixture was stirred at  $-20$  °C for 10~20 min until TLC analysis indicated that the reaction had completed. The reaction mixture was immediately poured into saturated  $\text{KHCO}_3$  aqueous solution at  $-20$  °C. The mixture was extracted with ethyl acetate (50 mL  $\times$  3). The organic phase was combined, washed with  $\text{H}_2\text{O}$  (15 mL), dried over  $\text{Na}_2\text{SO}_4$ , and condensed under reduced pressure. The residue was purified by column chromatography on silica gel (acetone: petroleum ether = 1:3), to afford **20** as an oil (120.0 mg, yield = 94%).  $^1\text{H-NMR}$  (500 MHz,  $\text{D}_2\text{O}$ )  $\delta$  5.89-5.79 (m, 1H), 5.25 (dq, 1H,  $J_1 = 1.5$  Hz, 17.5 Hz), 5.20 (dd, 1H,  $J_1 = 1.5$  Hz,  $J_2 = 10.5$  Hz), 5.17 (t, 1H,  $J_1 = J_2 = 9.5$  Hz), 4.95 (dd, 1H,  $J_1 = 8.5$  Hz,  $J_2 = 10.0$  Hz), 4.91 (dd, 1H,  $J_1 = 8.5$  Hz,  $J_2 = 8.0$  Hz), 4.52 (d, 1H,  $J = 8.0$  Hz, anomeric H), 4.48 (dd, 1H,  $J_1 = 2.0$  Hz,  $J_2 = 12.0$  Hz), 4.32 (d, 1H,  $J = 8.0$  Hz, anomeric H), 4.35-4.29 (m, 2H), 4.23 (dd, 1H,  $J_1 = 7.5$  Hz,  $J_2 = 11.5$  Hz), 4.16 (dd, 1H,  $J_1 = 5.0$  Hz,  $J_2 = 12.0$  Hz), 4.08 (ddt, 1H,  $J_1 = J_2 = 1.5$  Hz,  $J_3 = 6.5$  Hz,  $J_4 = 13.0$  Hz), 3.87 (s, br, 1H), 3.75 (t, 1H,  $J_1 = J_2 = 9.0$  Hz), 3.65-3.58 (m, 3H), 3.55-3.42 (m, 2H), 2.119 (s, 3H), 2.116 (s, 3H), 2.108 (s, 3H), 2.05 (s, 3H), 2.04 (s, 3H);  $^{13}\text{C-NMR}$  (125 MHz,  $\text{D}_2\text{O}$ )  $\delta$  171.29, 170.98, 170.66, 170.55, 169.59, 133.37, 117.61, 100.91, 99.42,

76.35, 73.34, 72.77, 72.65, 72.30, 71.44, 70.02, 68.52, 62.46, 62.20, 20.90, 20.83, 20.70.

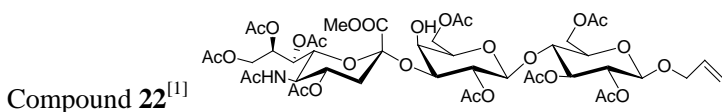

A mixture of **20** (1.0 eq.), **15** (1.5 eq.), and activated 4 Å molecular sieves (50 mg/mL THF) in dry THF was stirred for 0.5 h at r.t. under N<sub>2</sub> protection before it was cooled to -72 °C, then TMSOTf (0.15 eq.) was added by drop in three batches. The reaction mixture was stirred for 2-4 h until TLC analysis indicated that the reaction had completed. Triethylamine (2 eq.) was added, the solids were filtered off, and the filtrate was concentrated in vacuo. The residue was purified by column chromatography on silica gel (gradient acetonitrile in chloroform) to afford **22** as a white foam. Compound **22** was the only isolated isomer. <sup>1</sup>H-NMR (500 MHz, CDCl<sub>3</sub>) δ 5.89-5.79 (m, 1H), 5.54-5.49(m, 1H), 5.40 (dd, 1H, *J*<sub>1</sub> = 2.5 Hz, *J*<sub>2</sub> = 9.0 Hz), 5.25 (dq, 1H, *J* = 1.5 Hz, 17.5 Hz), 5.19 (dq, 1H, *J* = 1.5 Hz, 10.5 Hz), 5.17 (t, 1H, *J* = 9.5 Hz), 5.06 (d, 1H, *J* = 10.0 Hz), 4.97 (dd, 1H, *J*<sub>1</sub> = 8.0 Hz, *J*<sub>2</sub> = 10.0 Hz), 4.94 (dd, 1H, *J*<sub>1</sub> = 8.0 Hz, *J*<sub>2</sub> = 10.0 Hz), 4.81 (ddd, 1H, *J*<sub>1</sub> = 4.5 Hz, *J*<sub>2</sub> = 10.5 Hz, *J*<sub>3</sub> = 12.5 Hz), 4.54 (d, 1H, *J* = 8.0 Hz, anomeric H), 4.52 (d, 1H *J* = 8.0 Hz, anomeric H), 4.44 (dd, 1H, *J*<sub>1</sub> = 2.0 Hz, *J*<sub>2</sub> = 12.0 Hz), 4.39 (dd, 1H, *J*<sub>1</sub> = 2.5 Hz, *J*<sub>2</sub> = 12.5 Hz), 4.32-4.22 (m, 4H), 4.18 (dd, 1H, *J*<sub>1</sub> = 5.5 Hz, *J*<sub>2</sub> = 12.0 Hz), 4.11-4.00 (m, 3H), 3.93 (dd, 1H, *J*<sub>1</sub> = 2.5 Hz, *J*<sub>2</sub> = 10.5 Hz), 3.85 (t, 1H, *J* = 9.0 Hz), 3.78 (s, 3H, COOCH<sub>3</sub>), 3.63 (dd, 1H, *J*<sub>1</sub> = 6.0 Hz, *J*<sub>2</sub> = 6.5 Hz), 3.59 (ddd, 1H, *J*<sub>1</sub> = 2.0 Hz, *J*<sub>2</sub> = 5.0 Hz, *J*<sub>3</sub> = 9.5 Hz), 3.42-3.36 (m, 2H), 2.75 (dd, 1H, *J*<sub>1</sub> = 4.5 Hz, *J*<sub>2</sub> = 12.5 Hz, sialH-3eq), 2.21 (s, 3H, OAc), 2.13 (s, 3H, OAc), 2.09 (s, 9H, OAc), 2.06 (s, 3H, OAc), 2.04 (s, 3H, OAc), 2.03 (s, 3H, OAc), 2.02 (s, 3H, OAc), 1.87 (s, 3H, NAc), 1.83 (t, 1H, *J* = 12.0 Hz, sialH-3ax); HRMS (*m/z*): [M+Na]<sup>+</sup> calcd. for [C<sub>45</sub>H<sub>63</sub>NNaO<sub>28</sub>]<sup>+</sup>, 1088.3429; found, 1088.3391.

## **2. Supplementary Methods and Results on Biological Assay**

### **2.1. Procedure for coupling carbohydrates with protein:**

Modified GM3 and native GM3 were coupled with KLH to immune mice. A solution of carbohydrate (**2, 3, 4, 5, 6, 7, 8, 9, 10, 11, 12, 13**, 5.0 mg each), was oxidized with ozone to give the corresponding aldehyde, which was coupled to KLH (5.0 mg) in the presence of NaBH<sub>3</sub>CN (5.0 mg) in phosphate buffered saline (PBS 0.4 mL, 0.1 M, pH = 7.6).

For the preparation of carbohydrate-BSA conjugates, the recovered antigen aldehydes were employed to make full use of them. Thus, the glycoconjugation reaction mixture of modified GM3-KLH or native GM3-KLH was firstly dialyzed against small amount of PBS (0.85 mL, 0.1 M, pH = 7.6, 4 °C, molecular weight cut-off value 14,000 Da) for 4 h. The obtained dialysate, which included the unreacted antigen aldehyde, was then added with 1 mg of BSA and 3 mg of NaBH<sub>3</sub>CN.

The reaction mixture of modified GM3-BSA or native GM3-BSA was allowed to be gently shaken in the dark for 12-16 h at r.t., before being dialyzed against PBS at 4 °C (molecular weight cut-off value 14,000 Da, 1 L × 6 times PBS). The reaction mixture of modified GM3-KLH or native GM3-KLH was allowed to be gently shaken in the dark for 12-16 h at r.t., then first dialyzed against small amount of PBS to recover antigen aldehydes as mentioned above, and then dialyzed against 1 L × 6 times PBS.

### **2.2. Analysis of the carbohydrate loading levels of the glycoconjugates:**

The epitope ratios of the glycoconjugates (including carbohydrate-KLH and carbohydrate-BSA) were determined by estimating protein content by BCA assay<sup>[3]</sup> and sialic acid content using the resorcinol method described by Svennerholm<sup>[4]</sup> (**13**-KLH and **13**-BSA cannot develop legible color by this method, their carbohydrate contents were estimated by the phenol-sulfuric acid method<sup>[5]</sup>). The glycoconjugate (100 μL) was mixed well with the resorcinol reagent (100 μL) and heated in a boiling water bath for 30 min, then cooled on ice for 10 min. An extraction solution (1-butanol acetate and 1-butanol, 85:15 v/v, 250 μL) was added to the mixture. The mixture was kept standing still for 15 min after it was shaken vigorously to allow the organic layer to separate well from the inorganic layer. The absorbance at 580 nm of organic layer was determined by an UV-vis spectrometer, using a blank

organic solution as the control. The trisaccharide content of the glycoconjugate was determined against a calibration curve created with the corresponding allyl-trissachrides solutions analyzed under the same conditions<sup>[4]</sup>. The carbohydrate loading of each glycoconjugate was calculated according to the equation shown below:

$$\text{Loading of GM3 or modified GM3 (\%)} = \frac{\text{content of trisaccharide (mg) in the sample}}{\text{content of trisaccharide (mg) in the sample} + \text{content of protein (mg) in the sample}} \cdot 100\%$$

**Supplementary Table 1. Carbohydrate Loading of Glycoconjugates**

| sample    | KLH conjugates loading (%) | BSA conjugates loading (%) |
|-----------|----------------------------|----------------------------|
| <b>2</b>  | 9.05                       | 3.59                       |
| <b>3</b>  | 6.68                       | 2.81                       |
| <b>4</b>  | 9.35                       | 4.78                       |
| <b>5</b>  | 8.89                       | 4.72                       |
| <b>6</b>  | 6.85                       | 3.57                       |
| <b>7</b>  | 6.57                       | 4.53                       |
| <b>8</b>  | 6.82                       | 2.66                       |
| <b>9</b>  | 7.02                       | 4.48                       |
| <b>10</b> | 8.32                       | 4.09                       |
| <b>11</b> | 7.42                       | 3.23                       |
| <b>12</b> | 8.11                       | 4.71                       |
| <b>13</b> | 11.00                      | 5.47                       |
| <b>14</b> | 7.03                       | 2.80                       |

### 2.3. Immunization of mice and serologic assays

Pathogen-free BALB/c female mice aged 6–8 weeks (Number: SCXKjing2007-0001, SPF/VAF) were obtained from Department of Laboratory Animal Science, Peking University of Health Science Center. Groups of six mice were immunized four times at 2-week intervals with unmodified-GM3-KLH or modified-GM3-KLH glycoconjugates (each containing 2  $\mu\text{g}$  of  $\mu$  carbohydrate in PBS). The vaccines were administered intraperitoneally over the lower abdomen. Mice were bled prior to the initial vaccination, 13 days after the second and the third vaccinations, and 14 days after the fourth vaccination. Blood was clotted to obtain sera, which were stored at  $-80\text{ }^{\circ}\text{C}$ .

The total antigen-specific antibody titers of the pooled sera were assessed by means of ELISA. ELISA plate was coated with 100  $\mu\text{L}$  of 2-BSA (including 0.02  $\mu\text{g}$  of GM3) overnight at  $4\text{ }^{\circ}\text{C}$  (0.1 M bicarbonate buffer, pH = 9.6). After three washed with PBST (0.05% Tween20 in PBS), microwells were blocked with 3% BSA. After the plate was washed, serially diluted sera were added to microwells (100  $\mu\text{L}$  /well) and incubated for 1 h at  $37\text{ }^{\circ}\text{C}$ . The plate was washed and incubated with 1:5000 dilution of horseradish peroxidase-conjugated goat anti-mouse IgG ( $\gamma$ -chain specific) or IgM ( $\mu$ -chain specific) (Southern Biotechnology Associates, Inc., Buckingham, AL) for 1 h at  $37\text{ }^{\circ}\text{C}$ . The plate was washed, developed with *o*-phenylenediamine (OPD) substrate in the dark for 15 min, terminated with 2 M  $\text{H}_2\text{SO}_4$ , and then was read at 490 nm. The antibody titer was defined as the highest dilution showing an absorbance of 0.1, after subtracting background.

Meanwhile, the anti-modified-GM3 antibody titers (sera from 13 days after the 3rd vaccination) were determined by ELISA, with plate coated by the corresponding modified-GM3-BSA conjugates instead. The results were summarized in Supplementary Table 5.

**Supplementary Table 2. ELISA titers (obtained from pooled sera 13 days after 2nd vaccination)  
against 2-BSA**

| Group                         | IgG     | IgM    |
|-------------------------------|---------|--------|
| immunized with <b>2</b> -KLH  | 12,252  | 762    |
| immunized with <b>3</b> -KLH  | 106,740 | 24,930 |
| immunized with <b>4</b> -KLH  | 30,326  | <500   |
| immunized with <b>5</b> -KLH  | 44,563  | 5109   |
| immunized with <b>6</b> -KLH  | 1986    | 1315   |
| immunized with <b>7</b> -KLH  | 17,073  | <500   |
| immunized with <b>8</b> -KLH  | 25,402  | <500   |
| immunized with <b>9</b> -KLH  | 24,990  | <500   |
| immunized with <b>10</b> -KLH | 4121    | <500   |
| immunized with <b>11</b> -KLH | 10,573  | <500   |
| immunized with <b>12</b> -KLH | <2500   | <500   |
| immunized with <b>13</b> -KLH | <2500   | <500   |
| immunized with <b>14</b> -KLH | 2500    | <500   |

**Supplementary Table 3. ELISA titers (obtained from pooled sera 13 days after 3rd vaccination)  
against 2-BSA**

| Group                         | IgG     | IgM    |
|-------------------------------|---------|--------|
| immunized with <b>2</b> -KLH  | 63,902  | 3727   |
| immunized with <b>3</b> -KLH  | 277,143 | 37,437 |
| immunized with <b>4</b> -KLH  | 53,333  | 7800   |
| immunized with <b>5</b> -KLH  | 58,182  | 9719   |
| immunized with <b>6</b> -KLH  | 5109    | 10,235 |
| immunized with <b>7</b> -KLH  | 63,964  | <500   |
| immunized with <b>8</b> -KLH  | 97,419  | 3651   |
| immunized with <b>9</b> -KLH  | 50,612  | <500   |
| immunized with <b>10</b> -KLH | 22,009  | 2225   |
| immunized with <b>11</b> -KLH | 32,264  | 3220   |
| immunized with <b>12</b> -KLH | 7338    | <500   |
| immunized with <b>13</b> -KLH | <2500   | <500   |
| immunized with <b>14</b> -KLH | 5173    | 3542   |

**Supplementary Table 4. ELISA titers (obtained from pooled sera 14 days after 4th vaccination)  
against 2-BSA**

| Group                         | IgG       | IgM    |
|-------------------------------|-----------|--------|
| immunized with <b>2</b> -KLH  | 335,732   | 9697   |
| immunized with <b>3</b> -KLH  | 1,233,305 | 64,265 |
| immunized with <b>4</b> -KLH  | 387,615   | 14,012 |
| immunized with <b>5</b> -KLH  | 280,535   | 17,056 |
| immunized with <b>6</b> -KLH  | 18,493    | 6121   |
| immunized with <b>7</b> -KLH  | 315,634   | 4688   |
| immunized with <b>8</b> -KLH  | 529,891   | 5118   |
| immunized with <b>9</b> -KLH  | 186,877   | 5684   |
| immunized with <b>10</b> -KLH | 113,837   | 6002   |
| immunized with <b>11</b> -KLH | 87,777    | 9963   |
| immunized with <b>12</b> -KLH | 50,158    | <1000  |
| immunized with <b>13</b> -KLH | <5000     | <1000  |
| immunized with <b>14</b> -KLH | 22,662    | 1220   |



**Supplementary Table 5. The anti-modified-GM3 antibody titers (serum from 13 days after 3rd vaccination)**

| Group                         | IgG     |
|-------------------------------|---------|
| immunized with <b>2</b> -KLH  | 63,902  |
| immunized with <b>3</b> -KLH  | 642,890 |
| immunized with <b>4</b> -KLH  | 105,387 |
| immunized with <b>5</b> -KLH  | 306,499 |
| immunized with <b>6</b> -KLH  | 128,827 |
| immunized with <b>7</b> -KLH  | 80,041  |
| immunized with <b>8</b> -KLH  | 231,026 |
| immunized with <b>9</b> -KLH  | 139,406 |
| immunized with <b>10</b> -KLH | 21,654  |
| immunized with <b>11</b> -KLH | 89,989  |
| immunized with <b>12</b> -KLH | 72,869  |
| immunized with <b>13</b> -KLH | 127,621 |
| immunized with <b>14</b> -KLH | 112,163 |

### Supplementary Figure 1

**a**

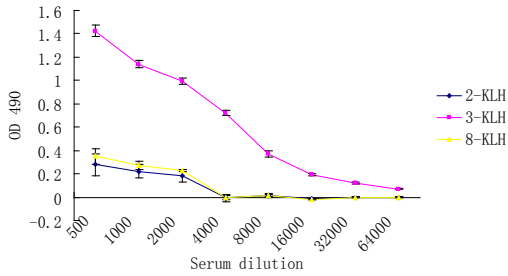

**b**

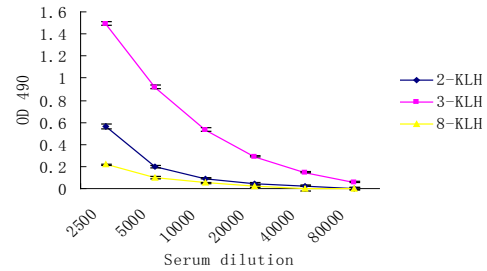

**IgM antibody titers of pooled sera immunized with 3-KLH, 8-KLH and 2-KLH by ELISA. (a)**

Pooled sera obtained from 13 days after the 3rd vaccination. **(b)** Pooled sera obtained from 14 days

after the 4th vaccination. All of the data points were the mean of three parallel measurement data.

Some error bars are smaller than the symbol width.

### Supplementary Figure 2

**a**

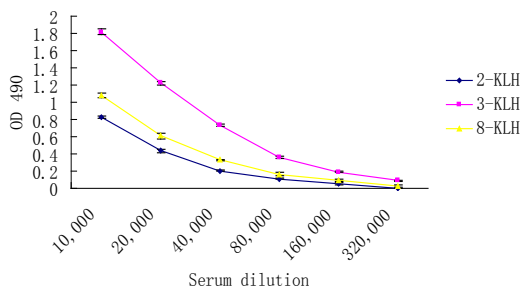

**b**

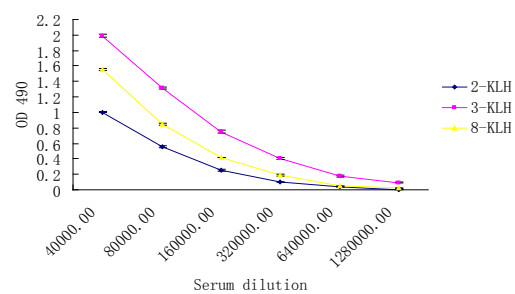

**IgG antibody titers of pooled sera immunized with 3-KLH, 8-KLH and 2-KLH by ELISA. (a)**

Pooled sera obtained from 13 days after the 3rd vaccination. **(b)** Pooled sera obtained from 14 days

after the 4th vaccination. All of the data points were the mean of three parallel measurement data.

Some error bars are smaller than the symbol width.

**Supplementary Table 6. Antibody titers against 2-BSA, 24-BSA of the pooled sera of mice immunized with 3-KLH, 8-KLH and 2-KLH after the 4th vaccination**

| Vaccine | 2-BSA     |        | 24-BSA |      |
|---------|-----------|--------|--------|------|
|         | IgG       | IgM    | IgG    | IgM  |
| 2-KLH   | 335,732   | 9697   | <250   | <250 |
| 3-KLH   | 1,233,305 | 64,265 | <250   | <250 |
| 8-KLH   | 529,891   | 5118   | <250   | <250 |

The antibody titers against 2-BSA, 24-BSA of the pooled sera of mice immunized with 2-KLH, 3-KLH and 8-KLH after the 4th vaccination were assessed by means of ELISA. For the detailed method, see Serological Assays of main text. ELISA plate was coated with 100  $\mu$ L of 2-BSA or 24-BSA (including 0.02  $\mu$ g of 2 or 24 respectively). When the plate was coated with 24-BSA, the antibody titers could not be detected (<250).

**Supplementary Table 7. IgM antibody titer against 2-BSA of individual mouse immunized with 2-KLH and 3-KLH after the 3rd vaccination**

| Mice | vaccine |         |
|------|---------|---------|
|      | 2-KLH   | 3-KLH*  |
| 1    | 697     | 139,456 |
| 2    | 2881    | 38,158  |
| 3    | 475     | 8737    |
| 4    | 2775    | 3932    |
| 5    | 1075    | 3227    |
| 6    | 414     | 7352    |

In the analysis, there were six mice per group (n = 6). The IgM antibody titer of individual mouse serum was separately detected twice, and three parallel pores were arranged in plates for each serum-diluted concentration. The titer represented the average of two detections. The data of titers were dealt with logarithmic function to base 10, and then statistical analysis was performed by independent two sample *t* test with equal variances. Value of *p* < 0.05 was considered to be statistically significant and was identified by \*. The results indicated that the IgM level for the conjugate of compound 3 exhibited a remarkable increase relative to 2 after the 3rd immunizations. The statistical analysis was performed with SAS software (version 9.1).

**Supplementary Table 8. IgM antibody titer against 2-BSA of individual mouse immunized with 2-KLH and 3-KLH after the 4th vaccination**

| Mice | vaccine |         |
|------|---------|---------|
|      | 2-KLH   | 3-KLH*  |
| 1    | 6520    | 341,868 |
| 2    | 41,771  | 99,239  |
| 3    | 8332    | 27,122  |
| 4    | 18,329  | 23,127  |
| 5    | 11,386  | 32,431  |
| 6    | 1780    | 72,281  |

In the analysis, there were six mice per group ( $n = 6$ ). The IgM antibody titer of individual mouse serum was separately detected twice, and three parallel pores were arranged in plates for each serum-diluted concentration. The titer represented the average of two detections. The data of titers were dealt with logarithmic function to base 10, and then statistical analysis was performed by independent two sample  $t$  test with equal variances. Value of  $p < 0.05$  was considered to be statistically significant and was identified by \*. The results indicated that the IgM level for the conjugate of compound **3** exhibited a remarkable increase relative to **2** after the 4th immunizations. The statistical analysis was performed with SAS software (version 9.1).

**Supplementary Table 9. IgG antibody titer against 2-BSA of individual mouse immunized with 2-KLH and 3-KLH after the 3rd vaccination**

| Mice | vaccine |           |
|------|---------|-----------|
|      | 2-KLH   | 3-KLH*    |
| 1    | 128,655 | 48,187    |
| 2    | 13,396  | 280,615   |
| 3    | 75,999  | 245,915   |
| 4    | 35,796  | 1,269,419 |
| 5    | 122,157 | 209,357   |
| 6    | 101,716 | 154,989   |

In the analysis, there were six mice per group ( $n = 6$ ). The IgG antibody titer of individual mouse serum was separately detected twice, and three parallel pores were arranged in plates for each serum-diluted concentration. The titer represented the average of two detections. The data of titers were dealt with logarithmic function to base 10, and then statistical analysis was performed by

independent two sample *t* test with equal variances. Value of  $p < 0.05$  was considered to be statistically significant and was identified by \*. The results indicated that the IgG level for the conjugate of compound **3** exhibited a remarkable increase relative to **2** after the 3rd immunizations. The statistical analysis was performed with SAS software (version 9.1).

**Supplementary Table 10. IgG antibody titer against 2-BSA of individual mouse immunized with 2-KLH and 3-KLH after the 4th vaccination**

| Mice | vaccine   |           |
|------|-----------|-----------|
|      | 2-KLH     | 3-KLH     |
| 1    | 557,686   | 508,305   |
| 2    | 137,575   | 2,530,941 |
| 3    | 198,967   | 823,202   |
| 4    | 193,535   | 3,599,717 |
| 5    | 2,554,387 | 709,632   |
| 6    | 875,698   | 610,904   |

In the analysis, there were six mice per group ( $n = 6$ ). The IgG antibody titer of individual mouse serum was separately detected twice, and three parallel pores were arranged in plates for each serum-diluted concentration. The titer represented the average of two detections. Even if statistical significance could not be obtained here, the IgG level for the conjugate of compound **3** still exhibited an obviously increased tendency relative to **2** after the 4th immunization.

### 3. References

- [1] T. Ogawa, M. Sugimoto, S. Yoshiyasu, M. Ito, *U.S. Patent* **1986**, No. 4968786.
- [2] R.-B. Yan, F. Yang, Y. Wu, L.-H. Zhang, X.-S. Ye, *Tetrahedron Lett.* **2005**, *46*, 8993-8995.
- [3] (a) V. S. Hornsey, C. V. Prowse, D. Pepper, *Journal of Immunological Methods* **1986**, *93*, 83-88;  
(b) P. K. Smith, R. I. Krohn, G. T. Hermanson, A. K. Mallia, F. H. Gartner, M. D. Provenzano, E. K. Fujimoto, N. M. Goetze, B. J. Olson, D. C. Klenk, *Analytical Biochemistry* **1985**, *150*, 76-85.
- [4] L. Svennerholm, *Biochim. Biophys. Acta* **1957**, *24*, 604-611.
- [5] M. Dubois, J. K. Gilles, J. K. Hamilton, P. A. Rebers, F. Smith, *Anal. Chem.* **1956**, *28*, 350-356.

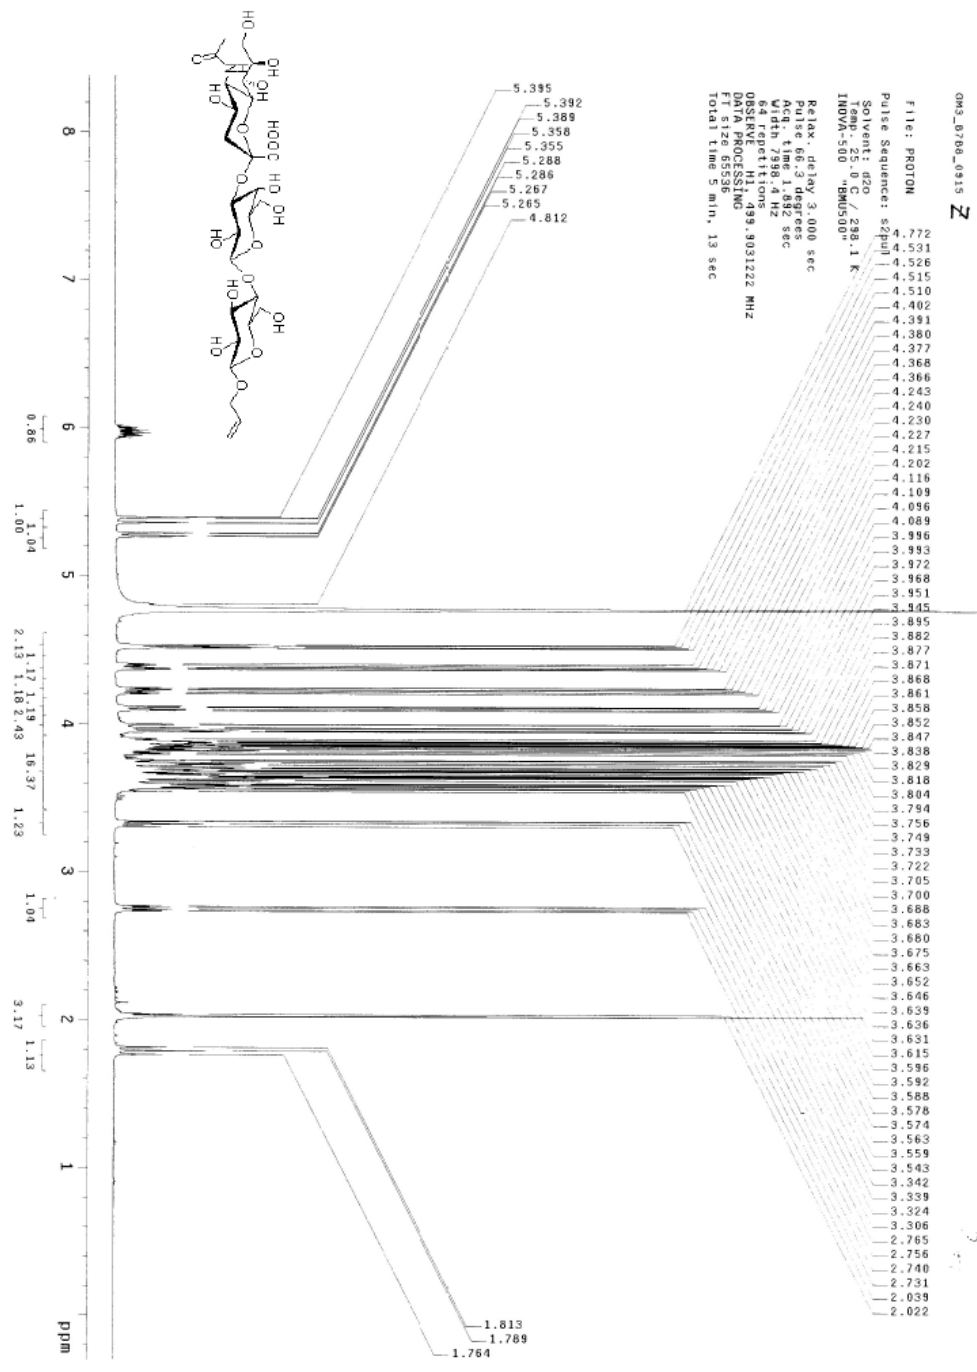

<sup>1</sup>H NMR of Compound 2

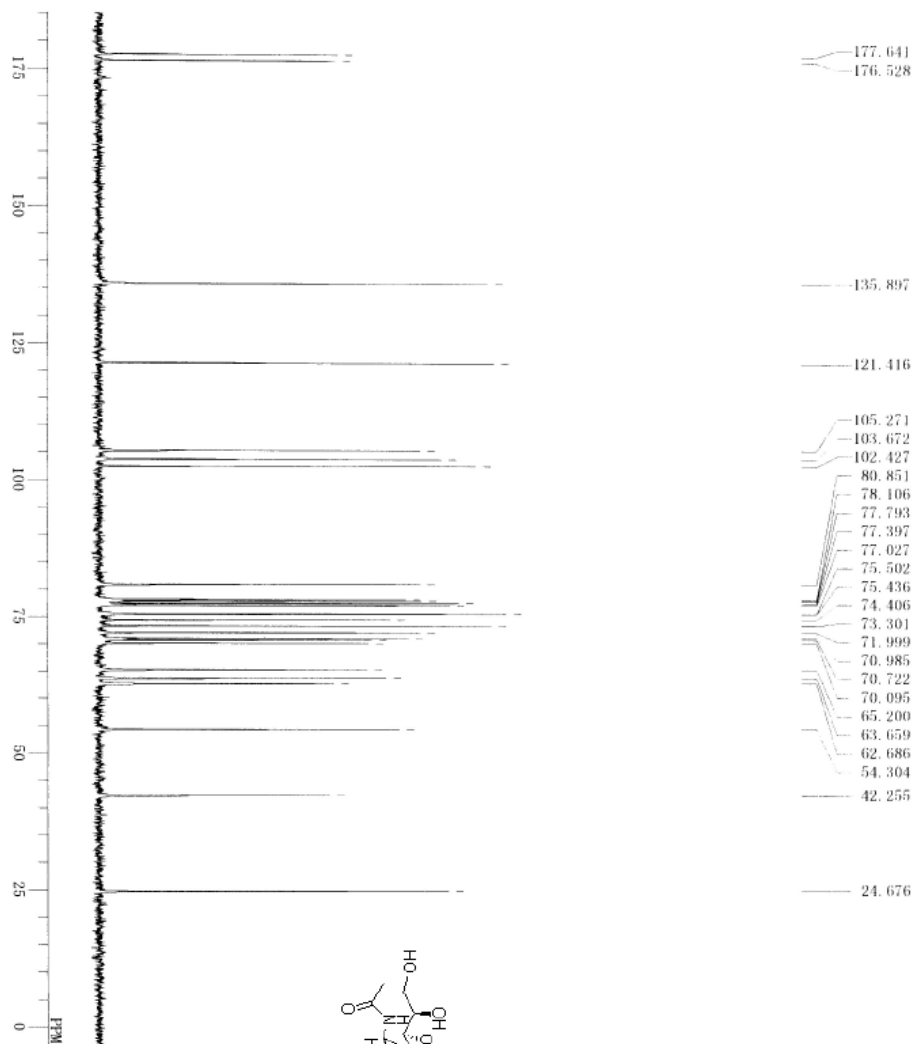

D:\VH\新山\GMRZ\_100T (.als  
 BR11E  
 ORNAC 13C  
 EXMOD RM  
 ORPRO 75.45 MHz  
 ORSFT 124.00 kHz  
 ORFIN 1840.0 Hz  
 POINT 32769  
 FREQU 20408.1 Hz  
 SCANS 13389  
 ACQTM 1.606 sec  
 PD 1.394 sec  
 PM1 4.2 us  
 LRATN 511  
 CTDP 22.4 c  
 SLVNT D2O  
 EXREF 0.00 ppm  
 RF 2.00 Hz  
 RGAIN 25

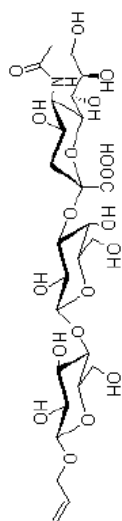

<sup>13</sup>C NMR of Compound 2



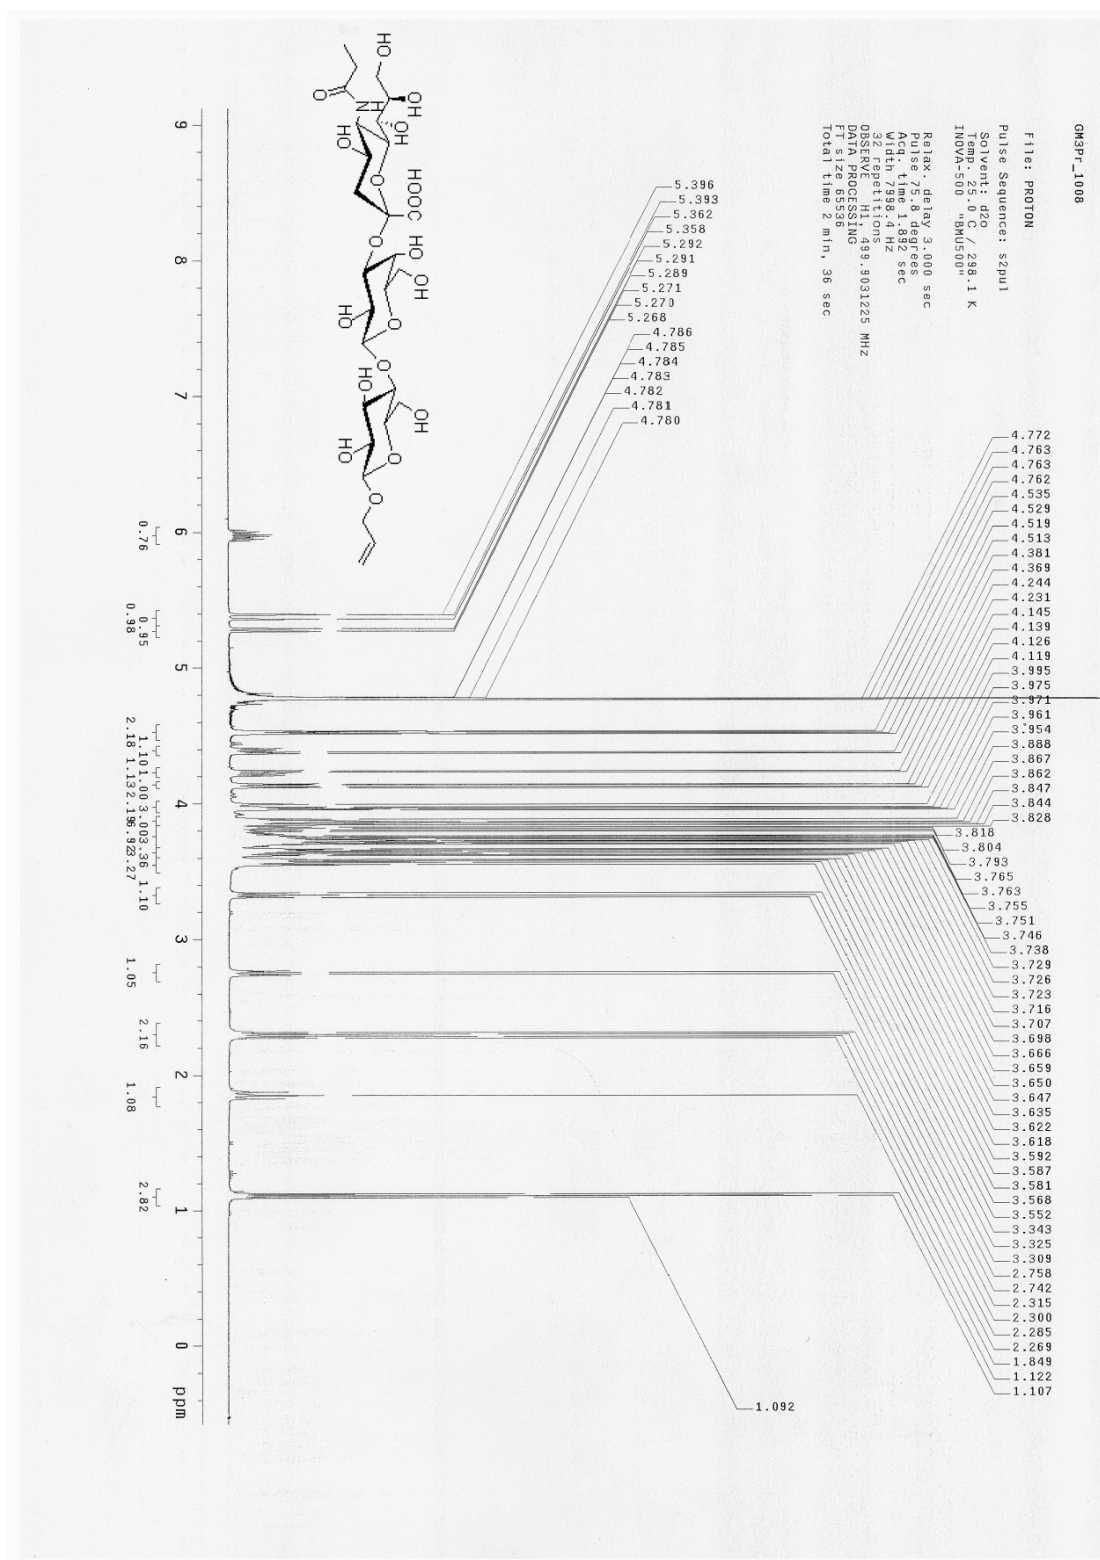

<sup>1</sup>H NMR of Compound 3



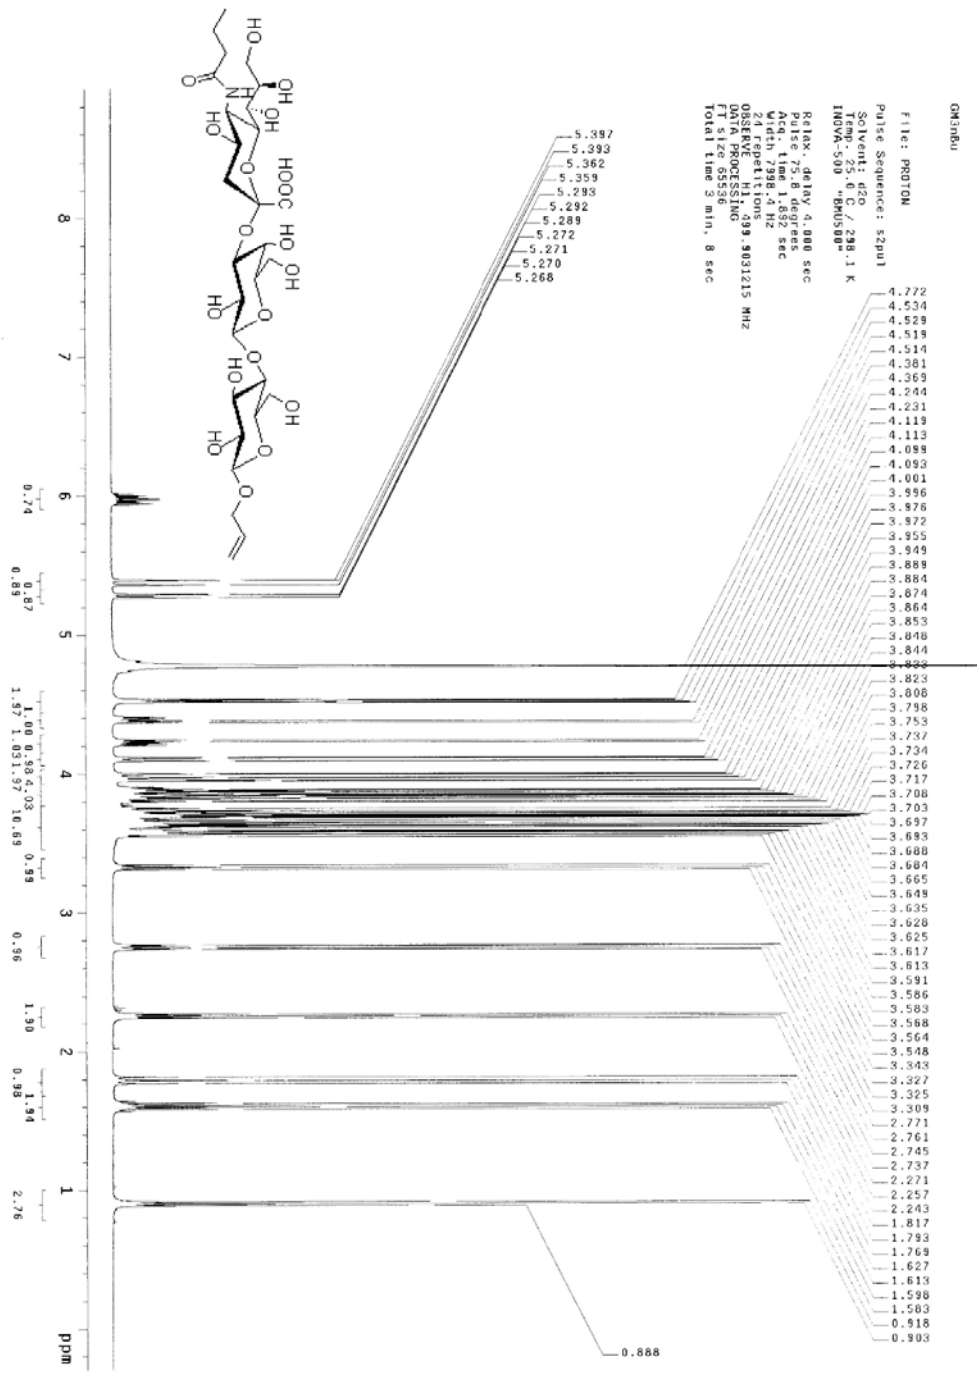

<sup>1</sup>H NMR of Compound 4





CHKX

File: CARBON  
Pulse Sequence: s2pul  
Solvent: d2o  
Temp: 25.0 C / 298.1 K  
User: 1-14-87  
INSTRUM: BM0500  
Relax: delay 1.000 sec  
Pulse: 87.8 degrees  
Acq: time 1.000 sec  
Width: 31421.8 Hz  
OBSERVE freq: 125.7608556 MHz  
DECOUPLE H1: 495.3056708 MHz  
Power: 38 dB  
CONTINUOUSLY ON  
NOISE SUPPRESSION ON  
DATA PROCESSING  
Line Broadening 3.0 Hz  
FT size 65536  
Total time 17 hr., 8 min., 39 sec

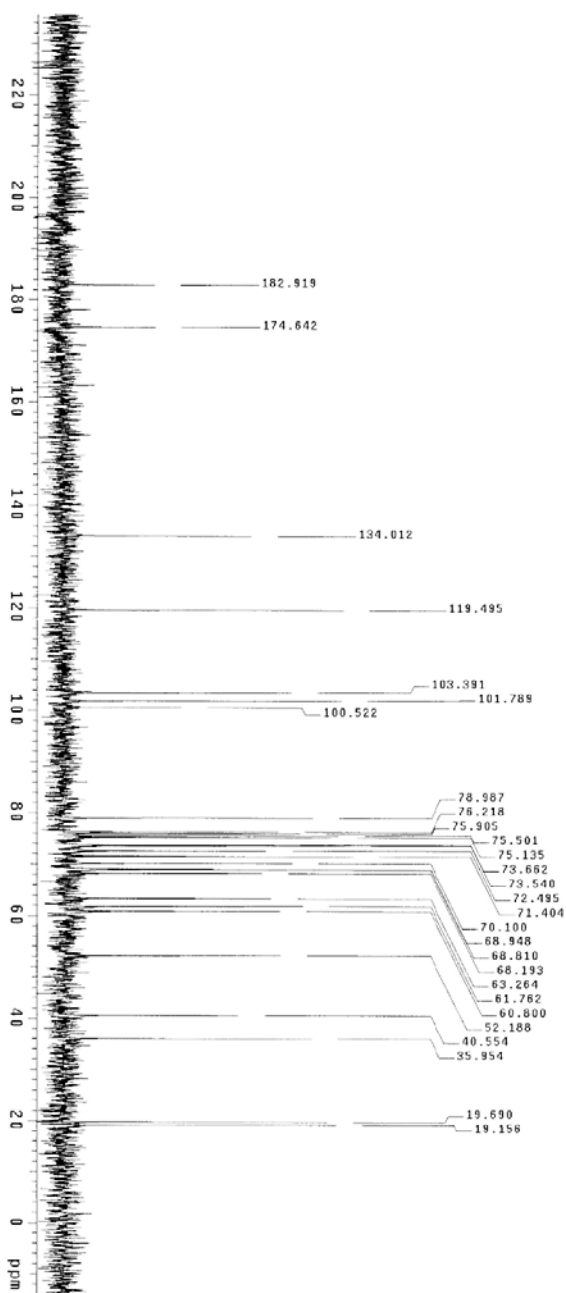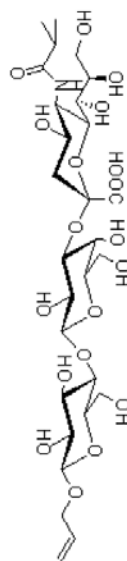

$^{13}\text{C}$  NMR of Compound 5







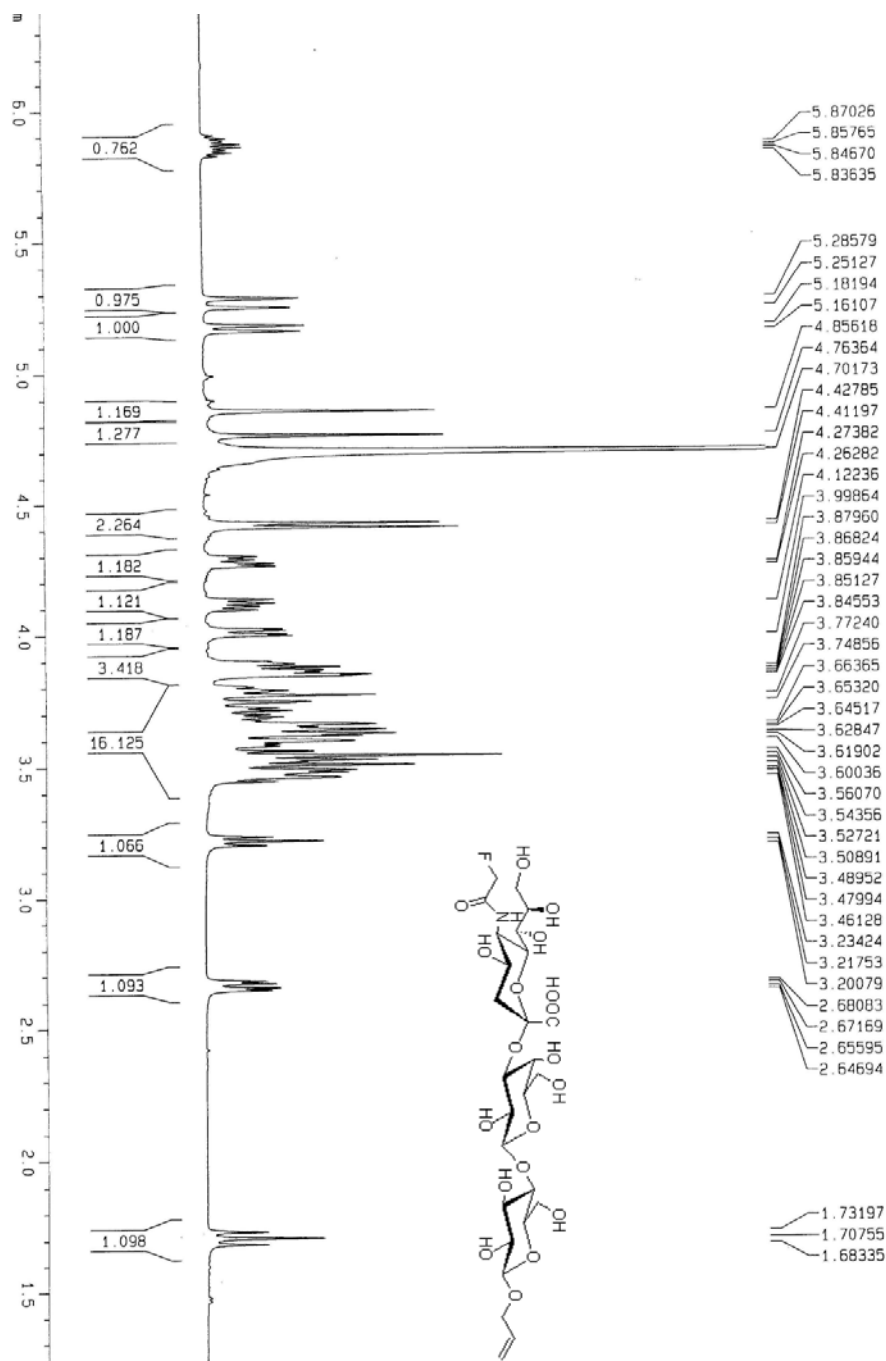

$^1\text{H}$  NMR of Compound 7

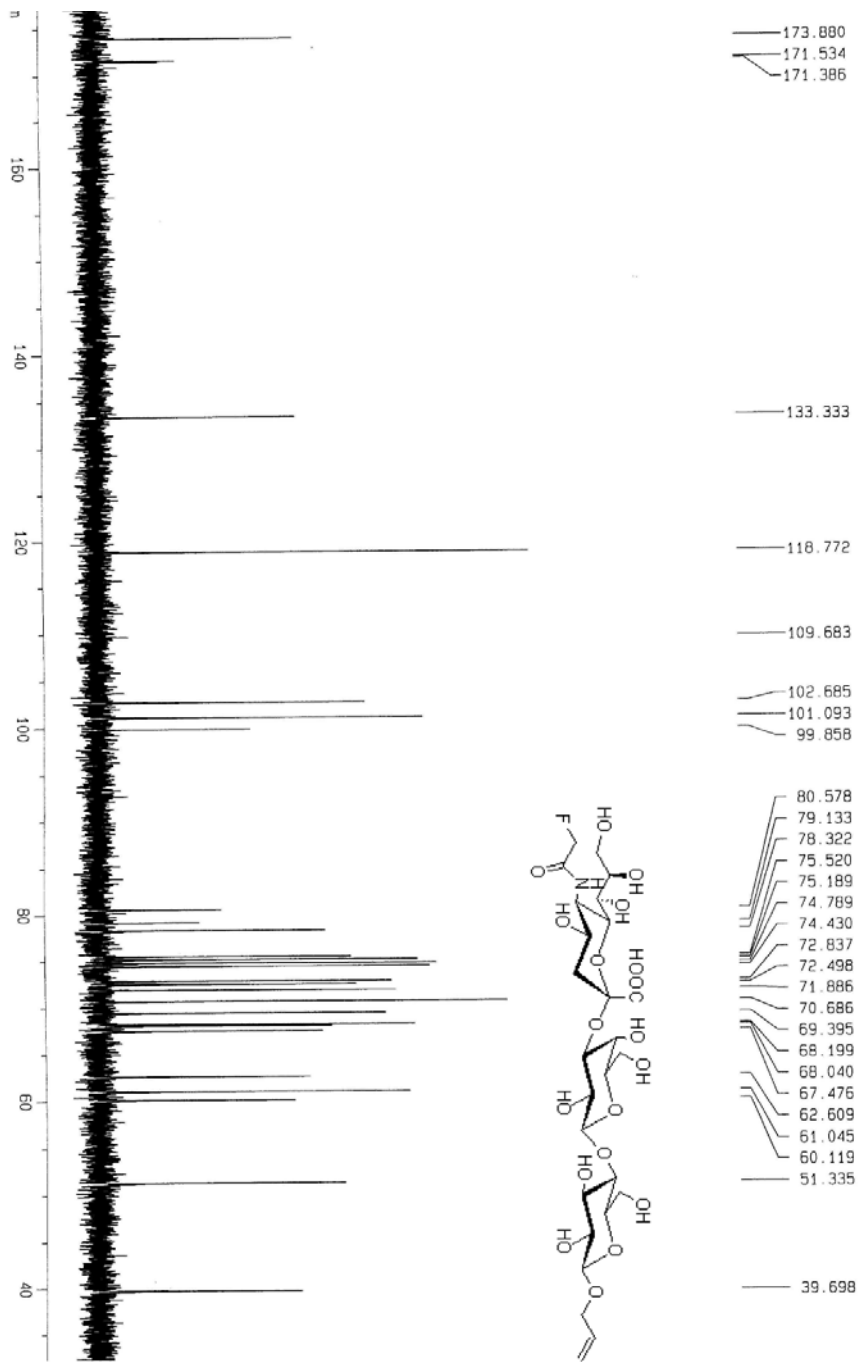

$^{13}\text{C}$  NMR of Compound 7

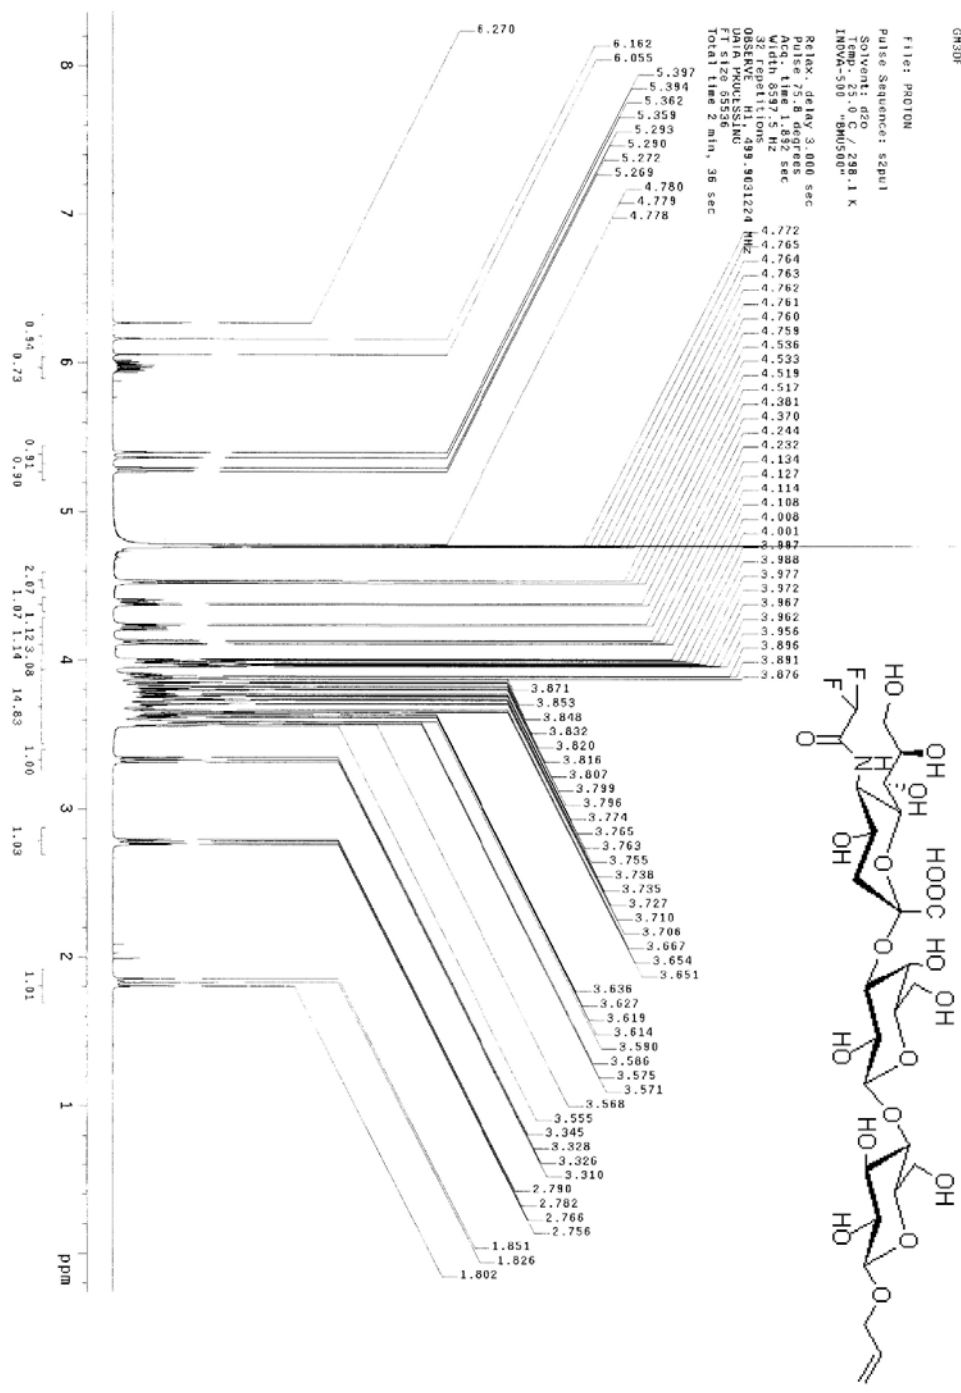

<sup>1</sup>H NMR of Compound 8

GM30F

File: CARBON

Pulse Sequence: s2pul

Solvent: d2o

Temp: 25.0 C / 298.1 K

User: 1-13-87

INSTRUM: BM5000

Relax: delay 1.000 sec

Pulse: 87.8 degrees

Acq: time 1.000 sec

Width: 31421.8 Hz

Offset: 131.125 Hz

OBSERVE: C13 125.7006556 MHz

DECOUPLE: H1 499.5056708 MHz

Power: 38 db

Cont: nucleus 13C

Acq: time 1.000 sec

DATA PROCESSING

Line broadening 2.0 Hz

FT size 65535

Total time 17 hr , 8 min , 33 sec

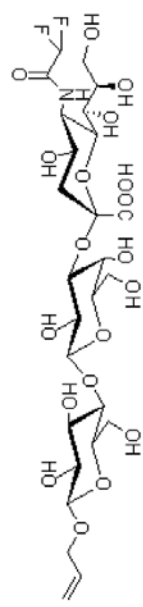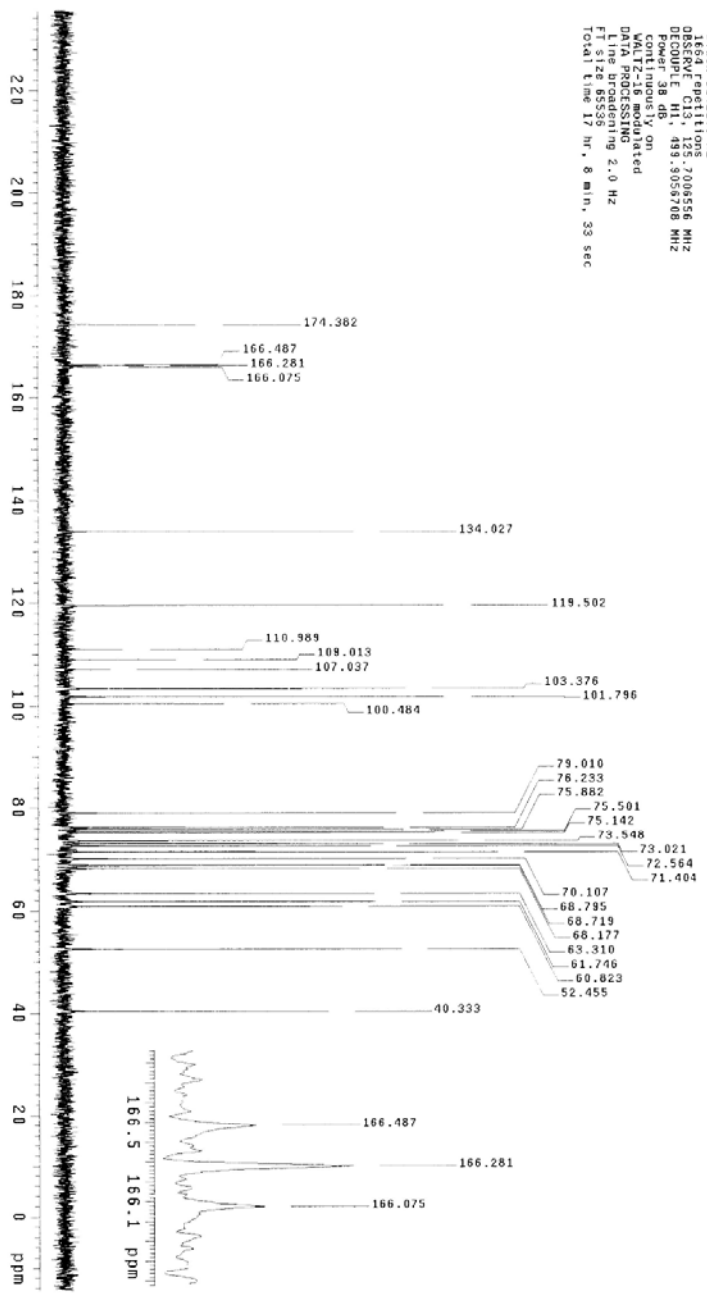

<sup>13</sup>C NMR of Compound 8





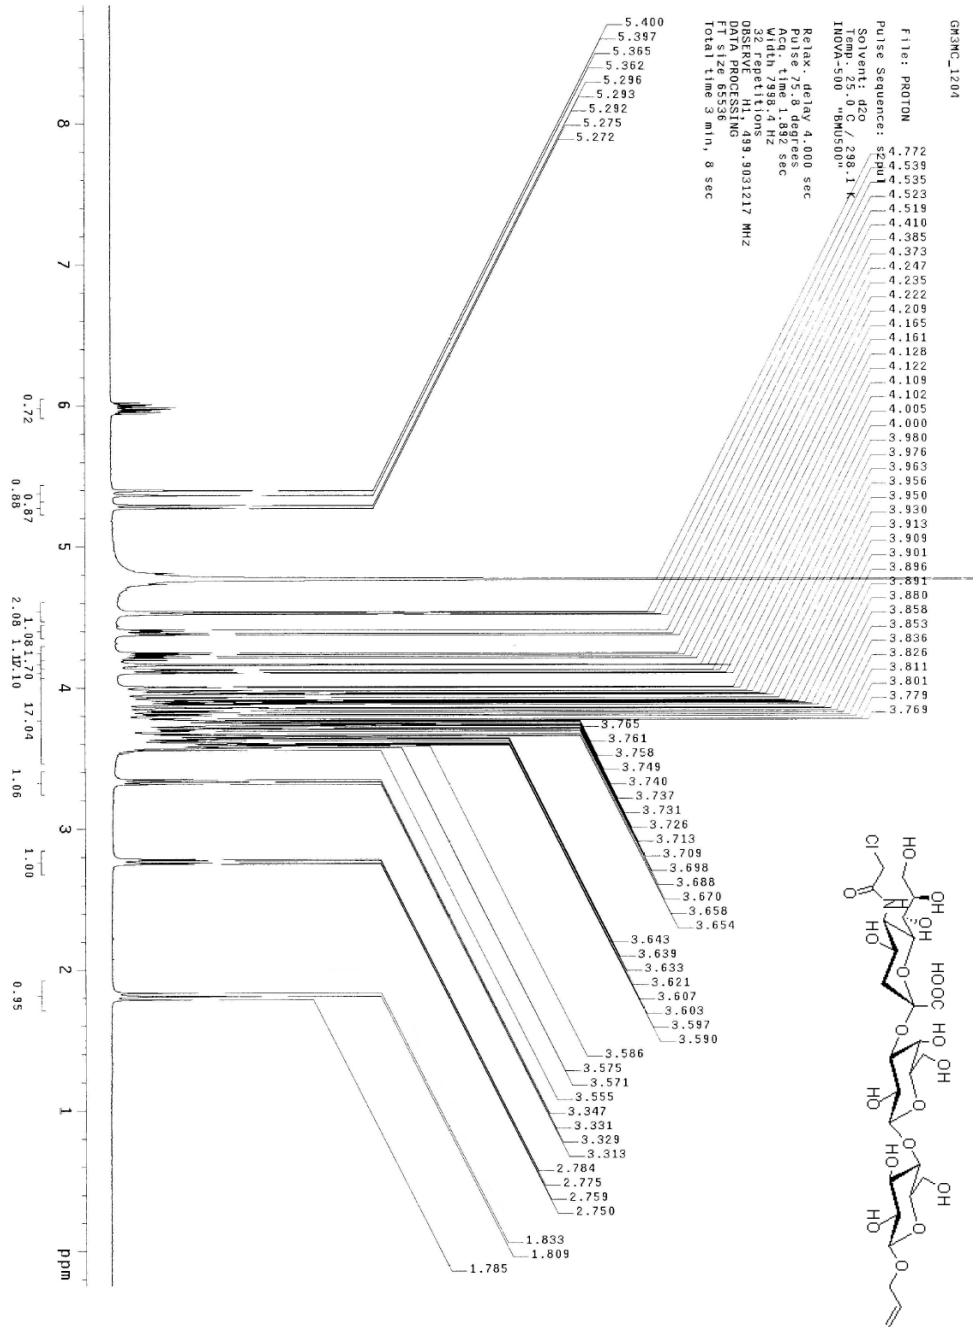

<sup>1</sup>H NMR of Compound 10

CR3NC\_1201

File: CR309N  
Pulse Sequence: s2pul  
Solvent: d2o  
Temp: 25.0 C / 296.1 K  
User: 1-14-07  
INOVA-500 "800500"  
R1: 401.471 Hz  
Pulse: 82.800000 sec  
Pulse: 82.800000 sec  
Acq. time: 1.000 sec  
Width: 31421.8 Hz  
S2: 700555.6 MHz  
S2: 700555.6 MHz  
DECOUPLE: H1, 495.505208 MHz  
Power: 38 dB  
CONTINUOUSLY ON  
Acquire: 1.000 sec  
DATA PROCESSING  
Line broadening: 3.0 Hz  
FT size: 65535  
Total time: 17 min., 8 min., 33 sec

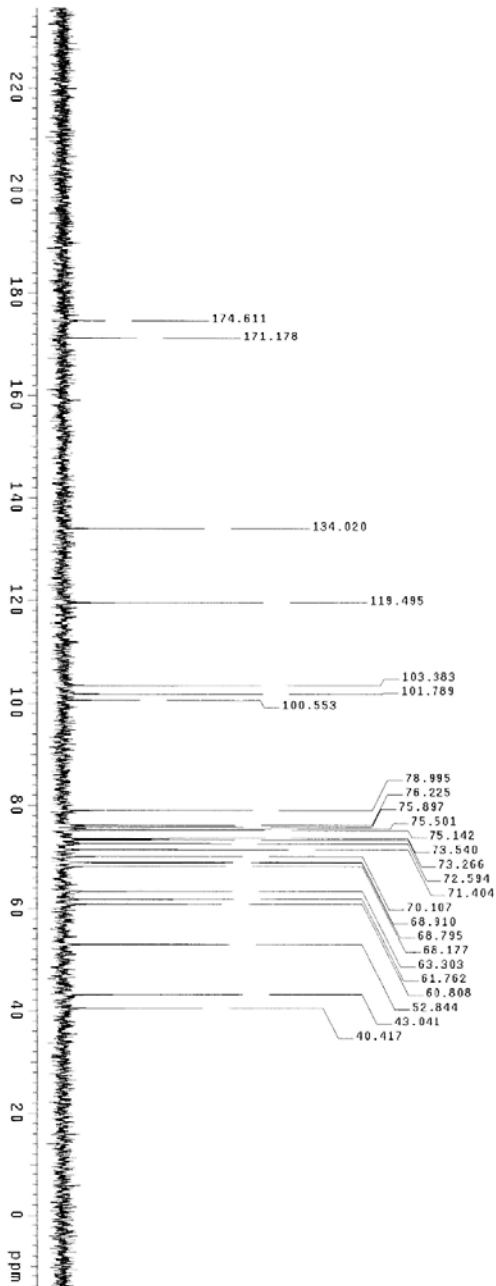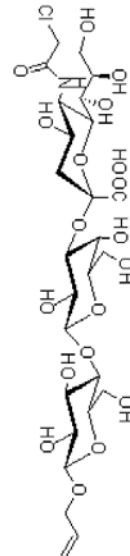

<sup>13</sup>C NMR of Compound 10



GM30C\_0215

File: PROTON  
Pulse Sequence: s2pul1  
Solvent: D2O  
Temp: 25.3 C / 298.1 K  
INOVA-500 "9MUS001"  
Relax: 6014V 3.000 sec  
Acq: 8014V 3.000 sec  
Acq: 1.882 sec  
Width 7998.4 Hz  
16 repetitions 99.9031224 MHz  
DMSO- $d_6$  PFG/SSIMG  
FT size 85536  
Total time 1 min, 18 sec

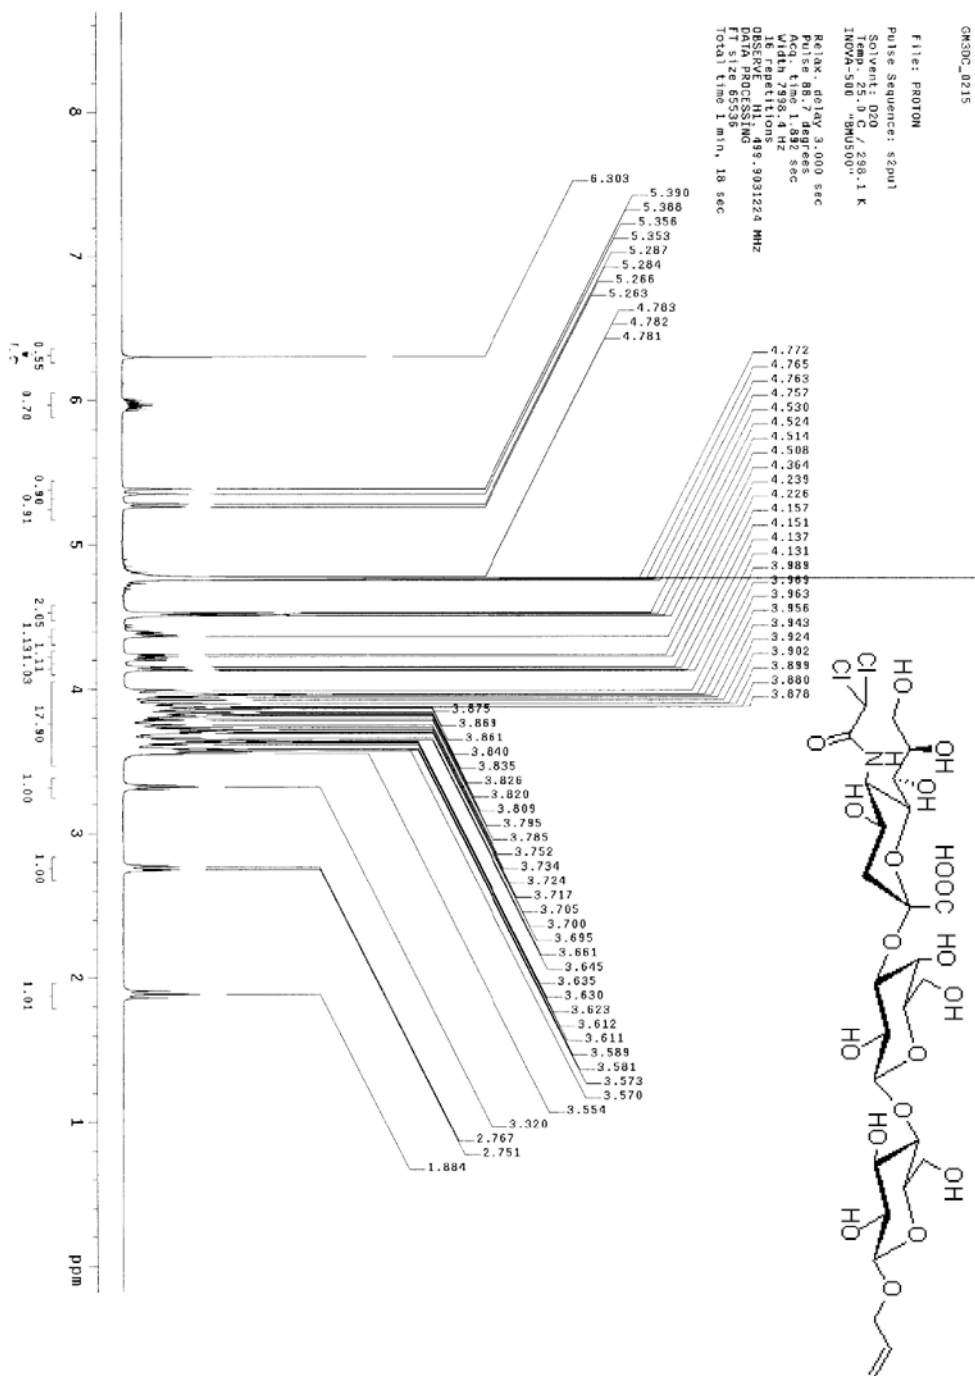

$^1\text{H}$  NMR of Compound 11

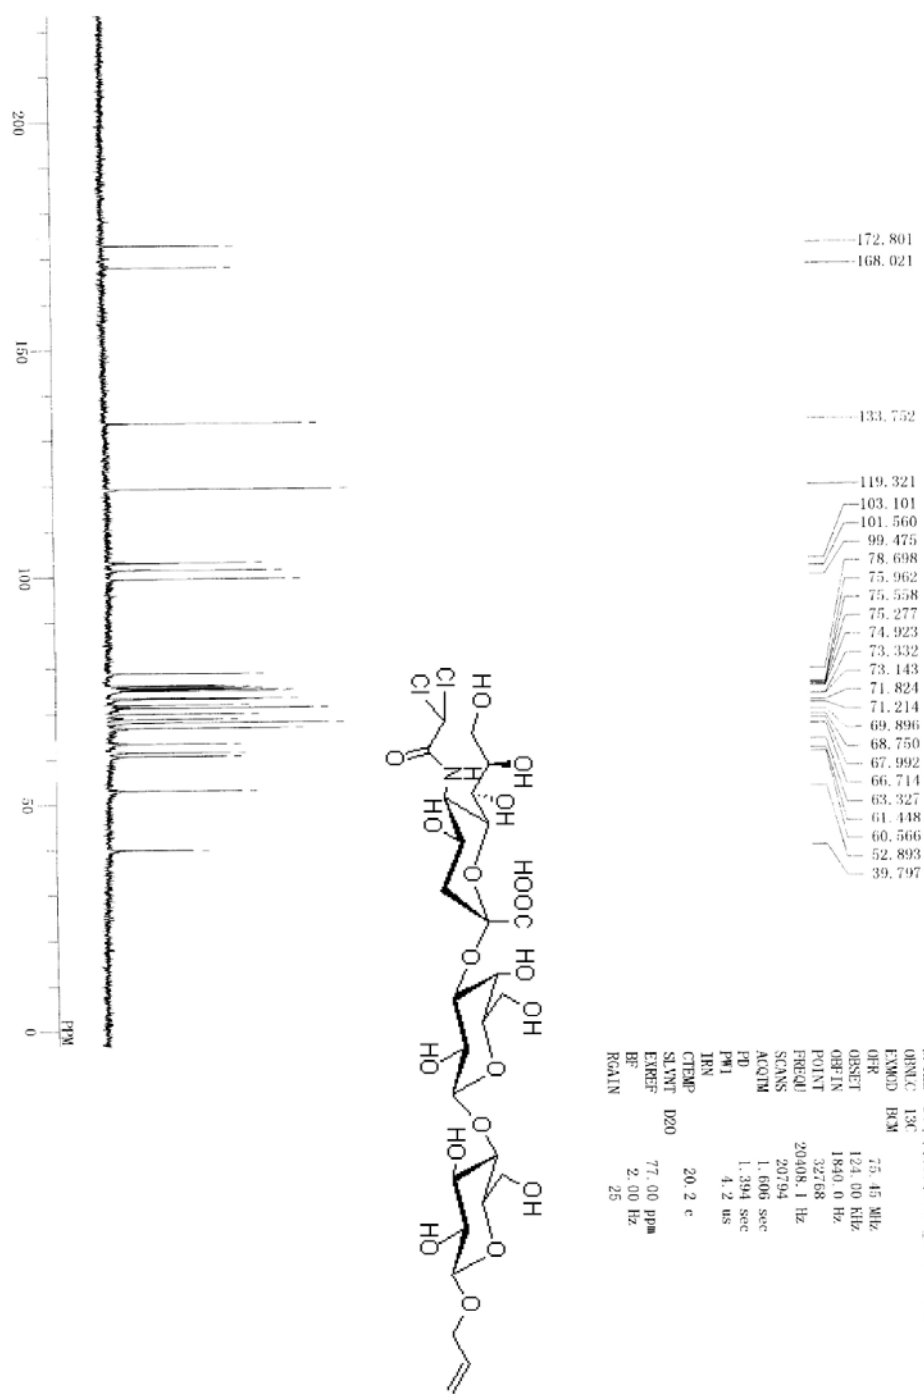

<sup>13</sup>C NMR of Compound 11

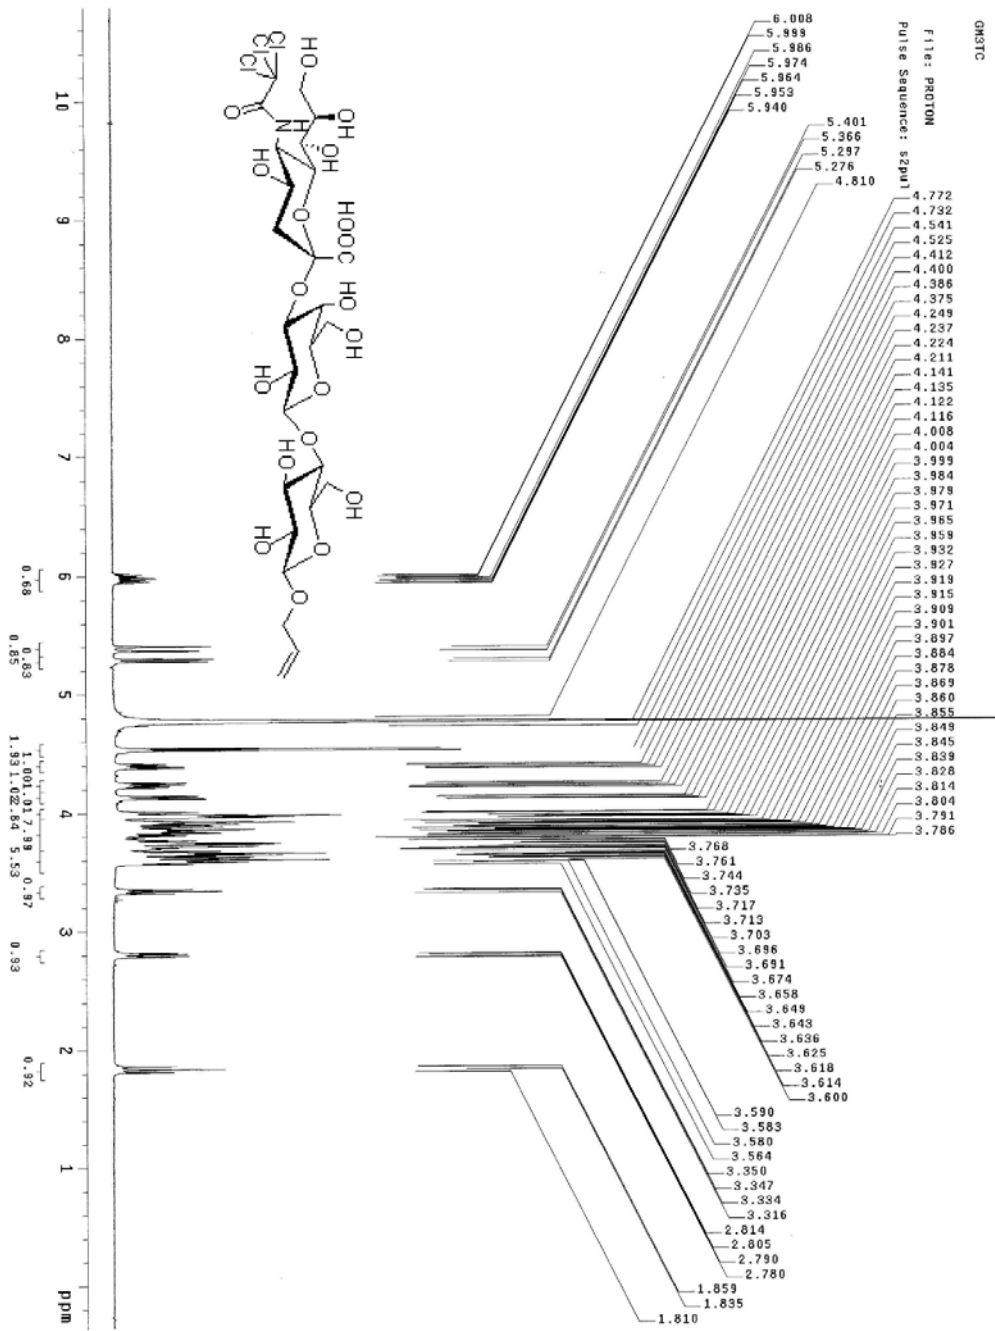

$^1\text{H}$  NMR of Compound 12

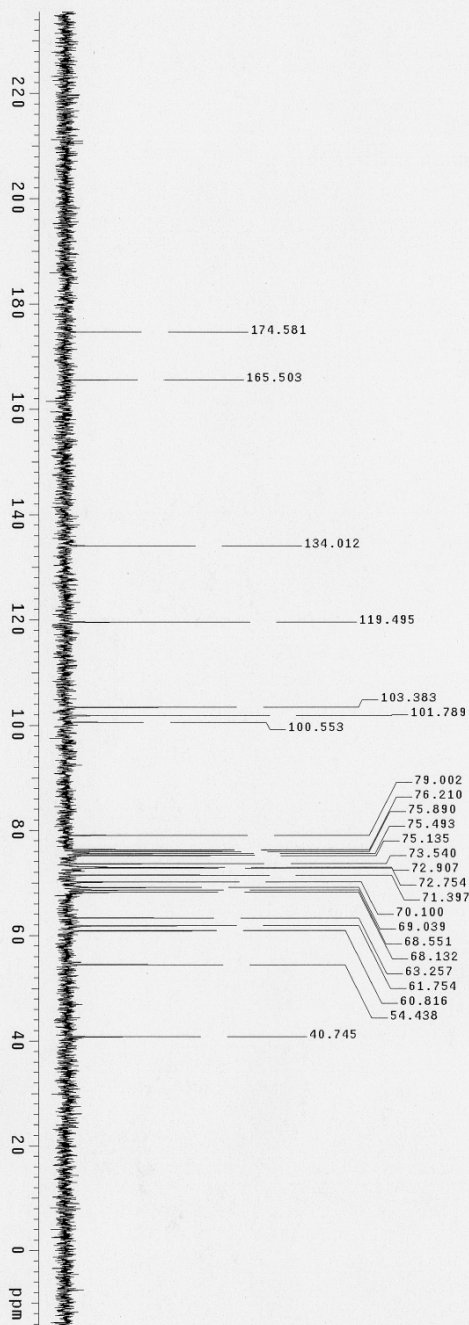

GM3TC  
File: CARRON  
Pulse Sequence: szpu1  
Solvent: d2o  
User: 1-14-87  
INOVA-500 "BMU500"  
Relax: delay 1.000 sec  
Pulse 97.8 degrees  
Acq. time 1.000 sec  
1312 Repetitions  
OBSERVE C13, 125.7006565 MHz  
DECUPLE H1, 499.9056708 MHz  
Power 35dB  
VOLTAGE 100V  
VOLTAGE modulated  
DATA PROCESSING  
Line Broadening 3.0 Hz  
F1 size 65536  
Total time 9 hr, 54 min, 16 sec

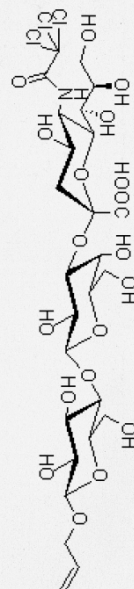

<sup>13</sup>C NMR of Compound 12

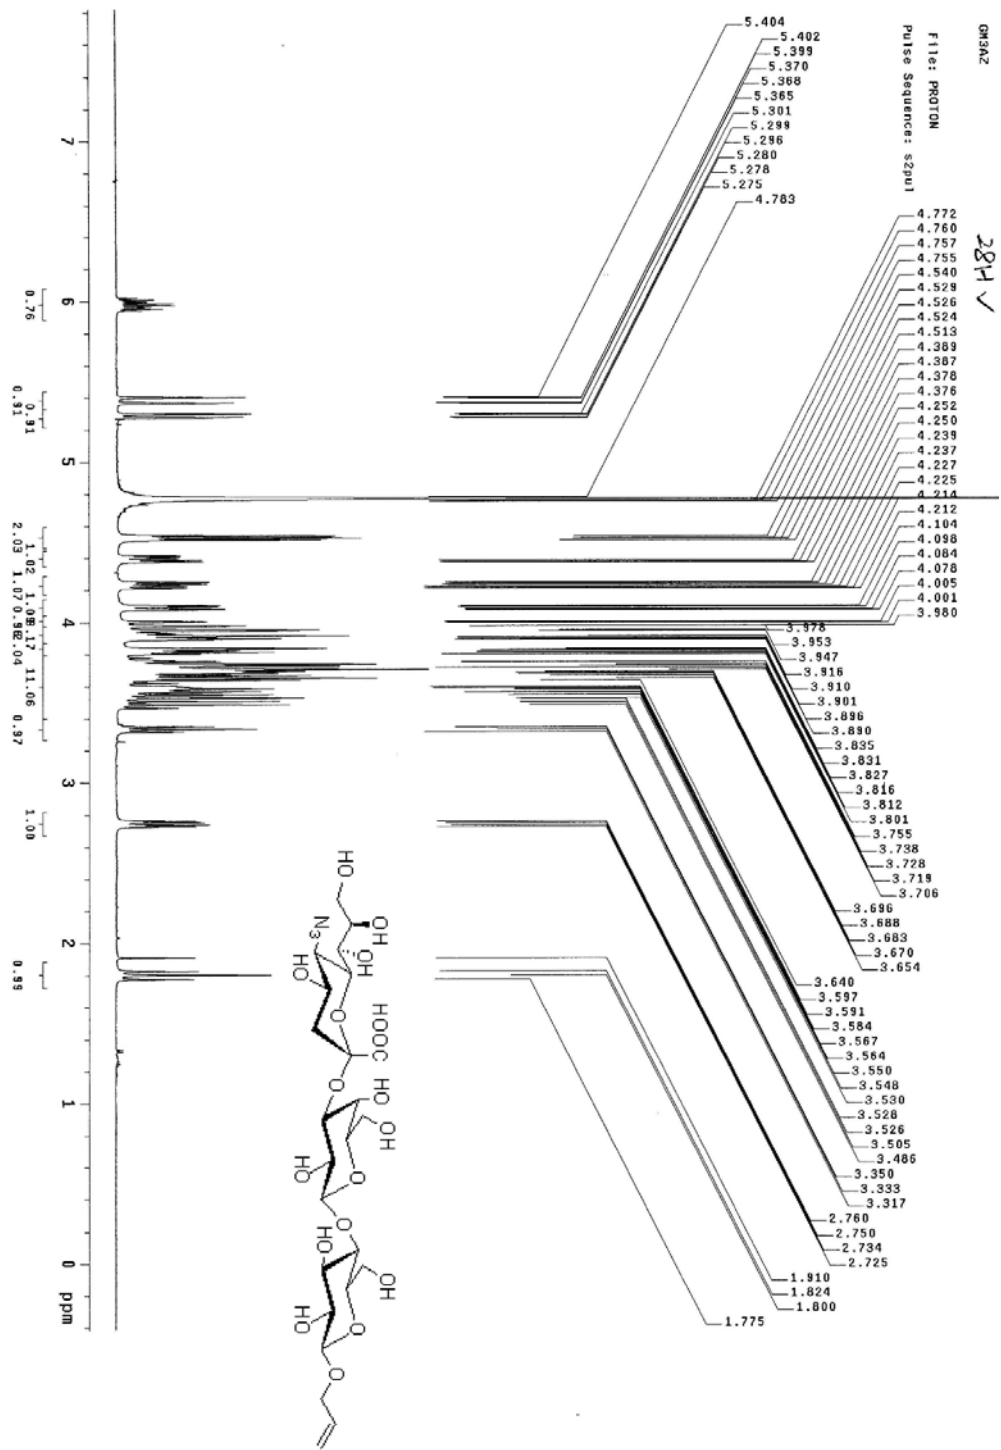

<sup>1</sup>H NMR of Compound 13

GM3AZ

242 ✓

File: CARBON  
Pulse Sequence: szpul  
Solvent: D2O / 288.1 K  
User: 1-14-87  
INDVA-500 "BMU500"

Relax. delay 1.000 sec  
Pulse 87.8 degrees  
Width 3.021 sec  
Mod 1.8 Hz  
864 repetitions  
OBSERVE C13, 125.700556 MHz  
DECUPLE H1, 499.9056708 MHz  
Couple: ON  
Format: 8B  
F2: 125.700556 MHz  
WALTZ-16 modulated  
DATA PROCESSING  
F. line broadening 3.0 Hz  
F. size 6536  
Total time 24 hr, 17 min, 8 sec

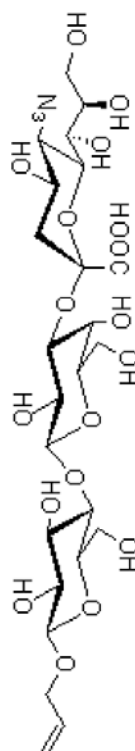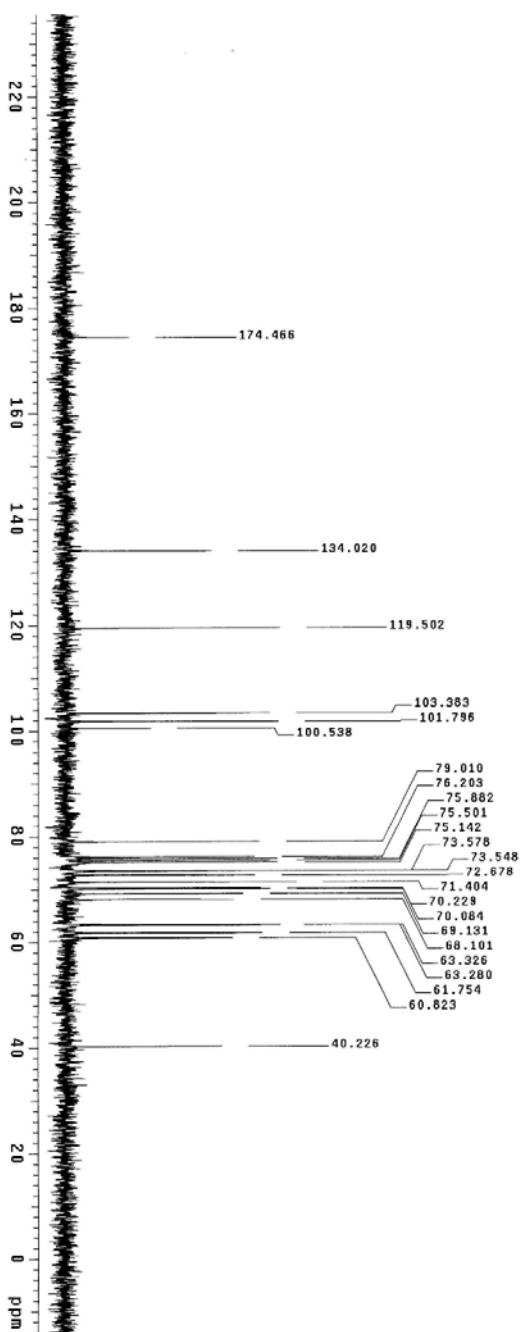

$^{13}\text{C}$  NMR of Compound 13

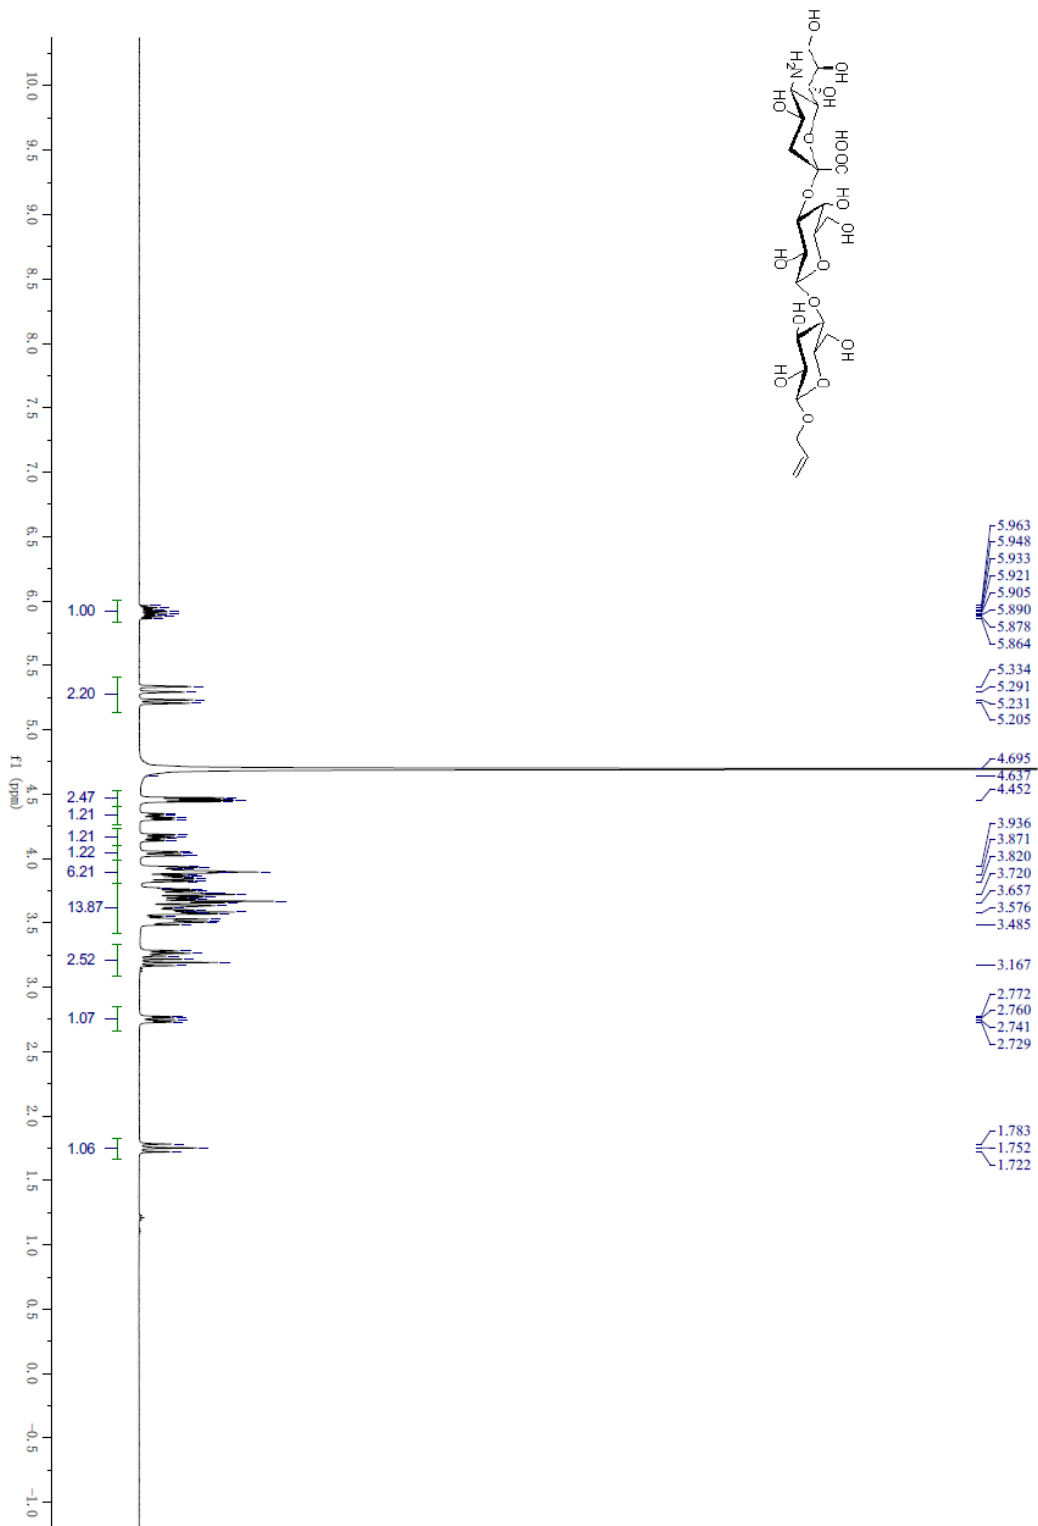

<sup>1</sup>H NMR of Compound 14

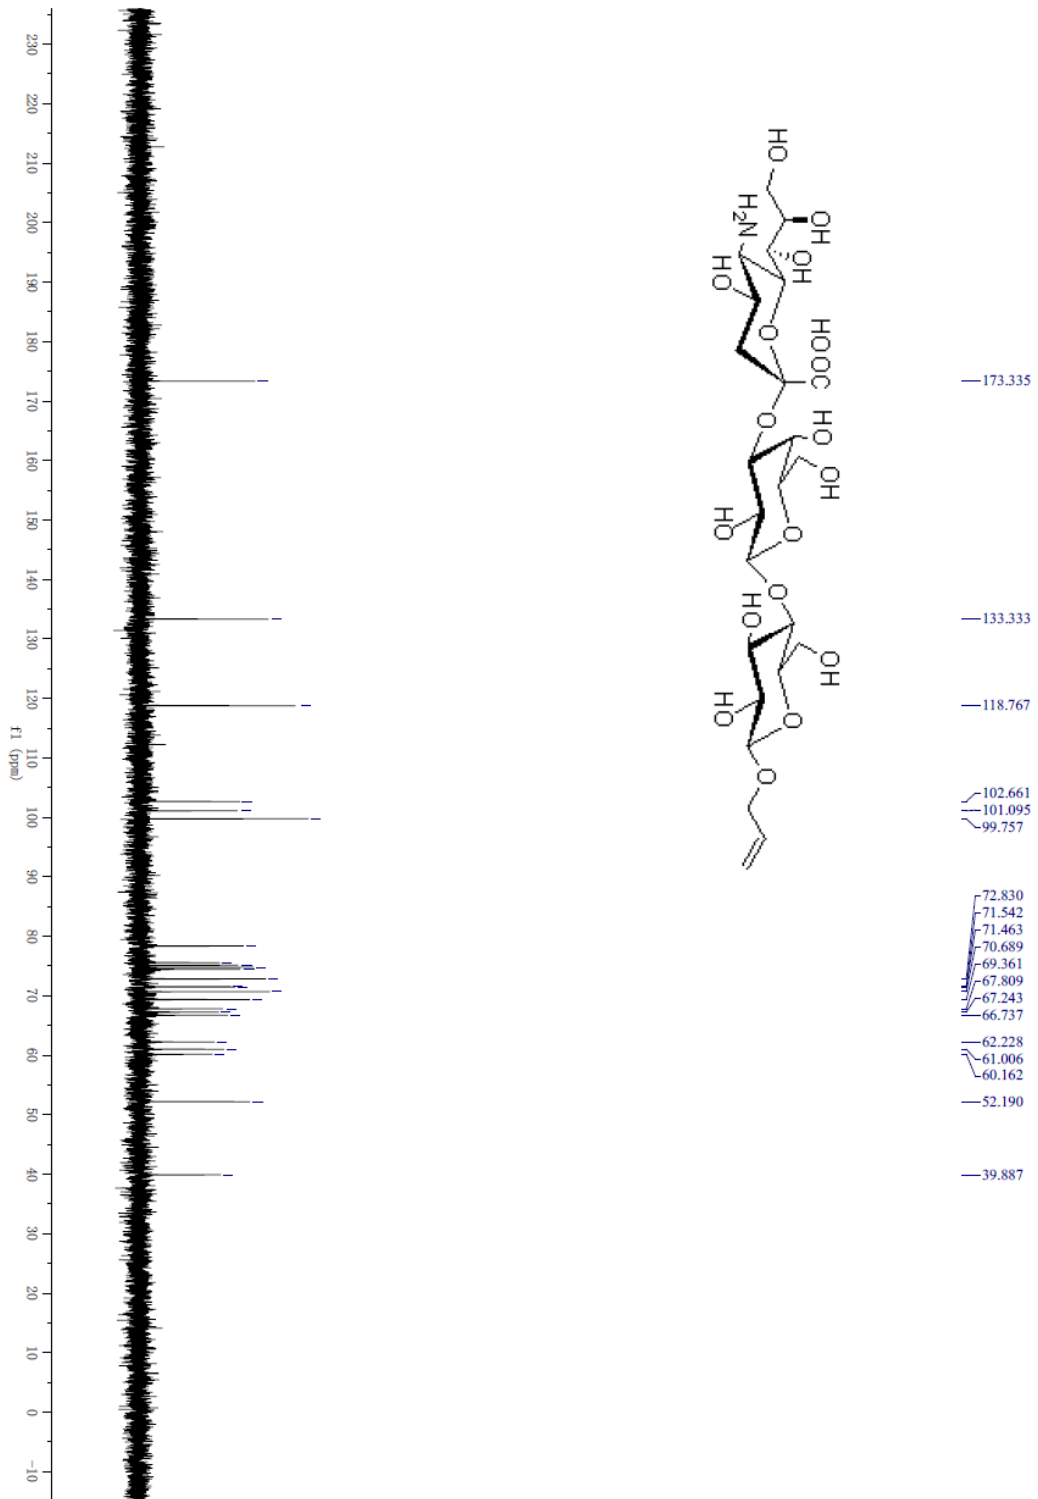

<sup>13</sup>C NMR of Compound 14



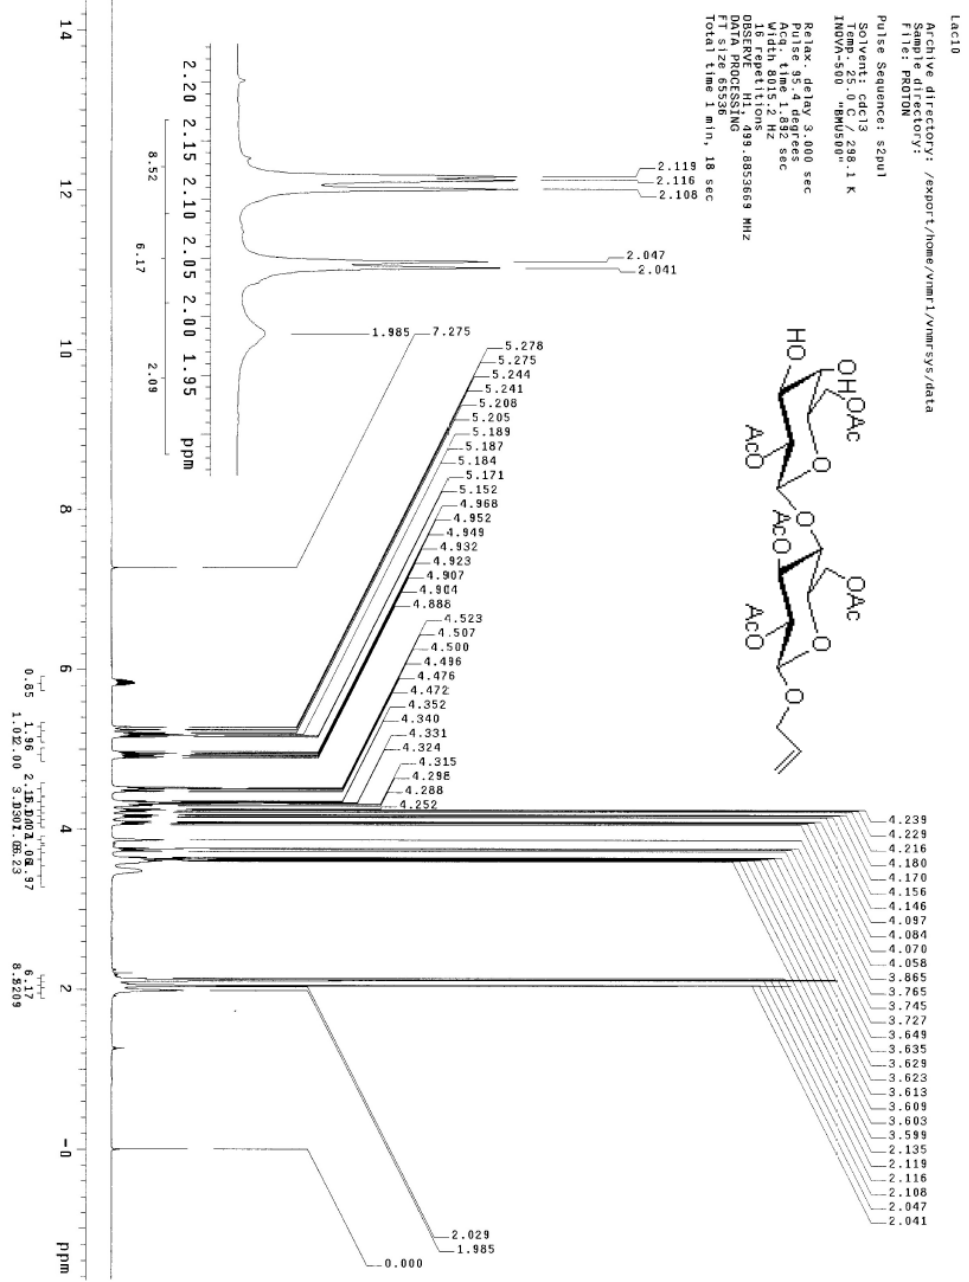

<sup>1</sup>H NMR of Compound 20

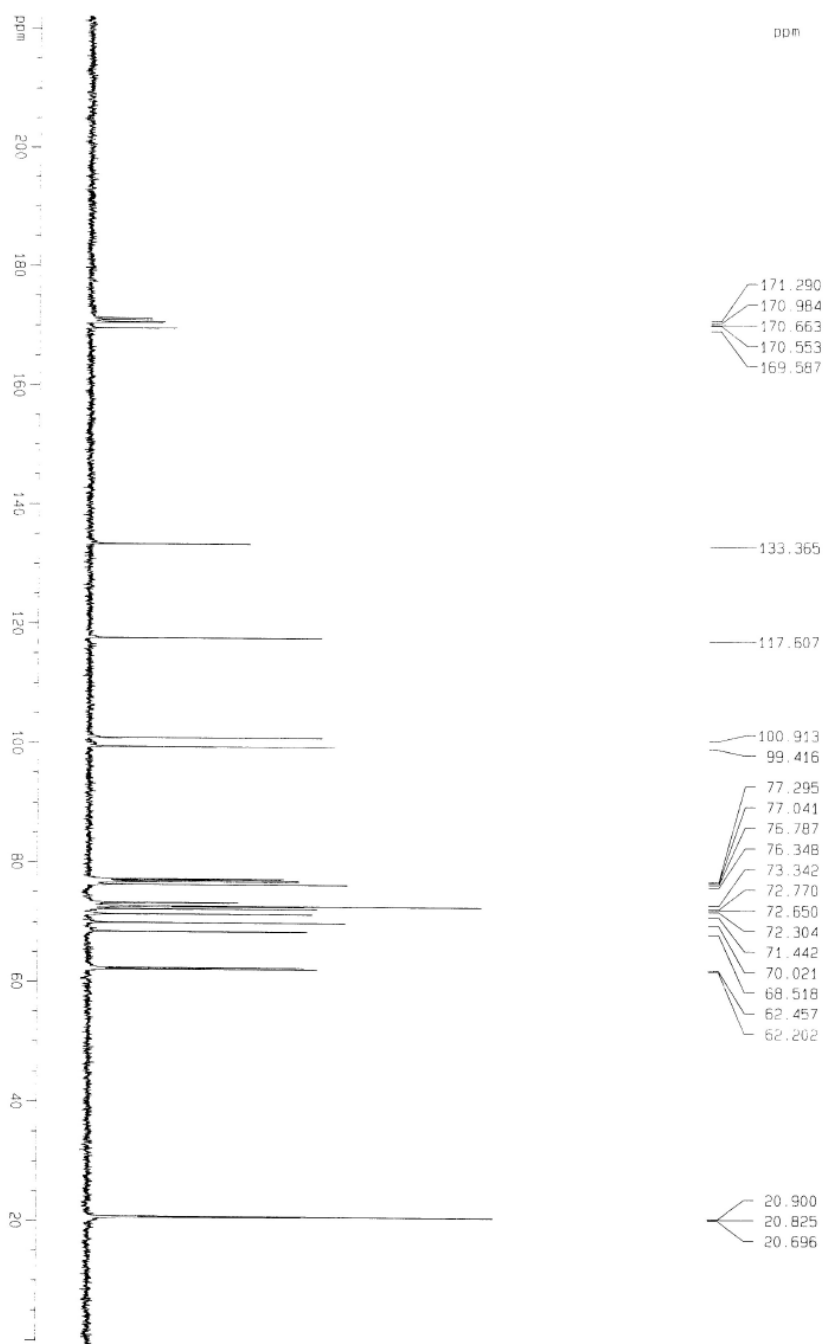

<sup>13</sup>C NMR of Compound 20

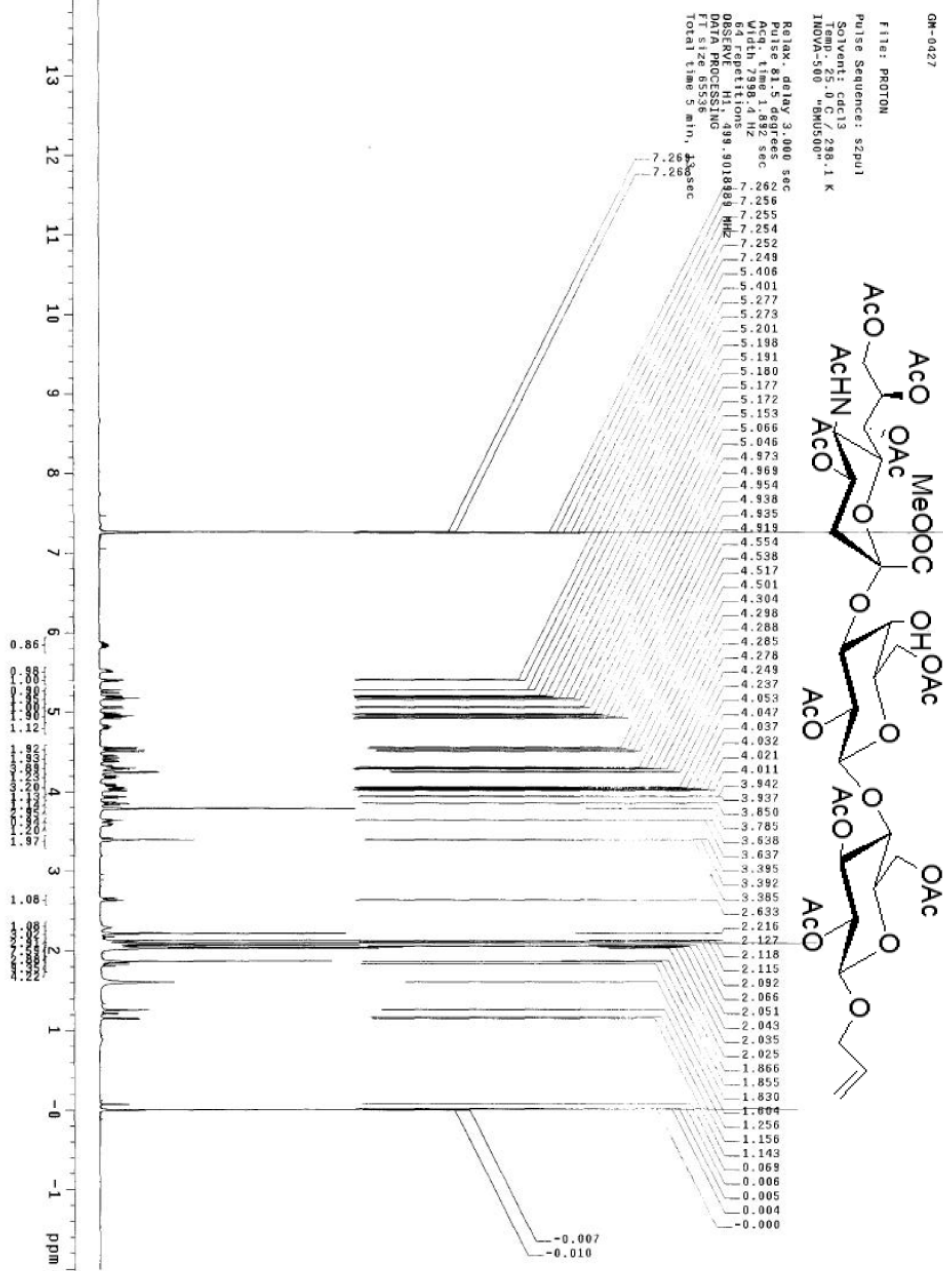

<sup>1</sup>H NMR of Compound 22
